1           **A small membrane protein critical to both the offensive and defensive**  
2                           **capabilities of *Staphylococcus aureus*.**

3  
4   Seána Duggan<sup>1#</sup>, Maisem Laabei<sup>2#</sup>, Alaa Alnahari<sup>1</sup>, Eóin C. O'Brien<sup>3</sup>, Keenan A. Lacey<sup>3§</sup>,  
5   Leann Bacon<sup>1</sup>, Kate Heesom<sup>4</sup>, Chih-Lung Fu<sup>5</sup>, Michael Otto<sup>5</sup>, Eric Skaar<sup>6</sup>, Rachel M.  
6   McLoughlin<sup>3</sup> and Ruth C. Massey<sup>1\*</sup>

7  
8   1: School of Cellular and Molecular Medicine, University of Bristol, Bristol, UK.

9   2: Department of Biology and Biochemistry, University of Bath, Bath, UK.

10   3: Host-Pathogen Interactions Group, School of Biochemistry and Immunology, Trinity  
11   Biomedical Sciences Institute, Trinity College Dublin, Ireland.

12   4: University of Bristol Proteomics Facility, Biomedical Sciences Building, University Walk,  
13   Bristol, BS8 1TD, UK.

14   5: Pathogen Molecular Genetics Section, Laboratory of Bacteriology, National Institute of  
15   Allergy and Infectious Diseases, U.S. National Institutes of Health, Bethesda, Maryland, USA.

16   6: Department of Pathology, Microbiology, and Immunology, Vanderbilt University Medical  
17   Center, Nashville, TN, USA.

18   §: Current Address: Department of Microbiology, New York University School of Medicine,  
19   New York, NY 10016, USA.

20  
21  
22   # contributed equally to this work

23   \* for correspondence: [ruth.massey@bristol.ac.uk](mailto:ruth.massey@bristol.ac.uk)

24  
25  
26

27 **Abstract**

28 *Staphylococcus aureus* is a major human pathogen, where the widespread emergence  
29 of antibiotic resistance is making infections more challenging to treat. Toxin induced tissue  
30 damage and resistance to the host's immune system are well established as critical to its  
31 ability to cause disease. However, recent attempts to study *S. aureus* pathogenicity at a  
32 population level have revealed significant complexity and hierarchical levels of regulation. In  
33 an effort to better understand this we have identified and characterized a principle effector  
34 protein, MasA. The inactivation of this small highly-conserved membrane protein  
35 simultaneously disrupts toxin production and impairs *S. aureus*' ability to resist several aspects  
36 of the innate immune system. These pleiotropic effects are mediated by both a change in the  
37 stability of the bacterial membrane and the dysregulation of iron homeostasis, which results  
38 in a significant impairment in the ability of *S. aureus* to cause infection in both a subcutaneous  
39 and a sepsis model of infection. That proteins with such major effects on pathogenicity remain  
40 unidentified in a bacterium as well studied as *S. aureus* demonstrates how incomplete our  
41 understanding of their ability to cause disease is, an issue that needs to be addressed if  
42 effective control and treatment strategies are to be developed.

43

44

45

46

## 47 Introduction

48 *Staphylococcus aureus* is a major human pathogen, where the types of infections it causes  
49 range in severity from relatively superficial skin and soft tissue infections (SSTIs) to fatal cases  
50 of endocarditis and bacteraemia<sup>1,2</sup>. While SSTIs rarely require clinical intervention, more  
51 invasive or prolonged infections require antibiotic treatment. Unfortunately, the widespread  
52 use of antibiotics has given rise to the emergence of antibiotic resistant strains of *S. aureus*,  
53 including the notorious methicillin resistant *S. aureus* (MRSA), which at its peak was reported  
54 to be responsible for in excess of 50% of *S. aureus* infections in hospitals<sup>3</sup>. Infection control  
55 measures and changes to antibiotic usage policies have led to a decrease in the incidence of  
56 MRSA in several counties. In England, where the surveillance of *S. aureus* bacteraemia is  
57 mandatory, the incidence of MRSA declined for several years (by >80% since 2007) and has  
58 recently plateaued<sup>4</sup>. However, the incidence of methicillin sensitive *S. aureus* (MSSA)  
59 bacteraemia has increased year on year and is now 29.4% higher than it was in 2011 when  
60 mandatory surveillance began<sup>3</sup>, a worrying trend that has also been observed in other  
61 countries<sup>4,5</sup>. Although new classes of antibiotics are under development, given the rate at  
62 which *S. aureus* evolves resistance, it is clear that we need to improve our understanding of  
63 this pathogen to develop alternative therapeutic strategies.

64

65 To date, our understanding of *S. aureus* pathogenicity has largely been informed by the  
66 analysis of a small number of laboratory strains that have been passaged *in vitro* many times.  
67 This approach has enabled the identification and characterisation of many of the proteins used  
68 by *S. aureus* to cause disease, and some of the complex means by which it regulates the  
69 expression of these proteins. For example, the secretion of toxins such as alpha-toxin<sup>6,7</sup> and  
70 the phenol-soluble modulins (PSMs)<sup>7,8</sup> has been associated with increased virulence; and  
71 nearly all toxins are under the control of a two-component, quorum sensing system called the  
72 accessory gene regulator (Agr)<sup>9,10</sup>. However, many additional regulatory systems also  
73 contribute to *S. aureus* virulence e.g. the alternative sigma factor, SigB, which amongst other  
74 things governs the characteristic gold pigmentation of *S. aureus*, a result of the expression of

75 the carotenoid staphyloxanthin<sup>11</sup>. Without this the bacteria are less able to defend themselves  
76 from immune attack. Not only is there huge diversity and complexity to the means by which *S.*  
77 *aureus* interacts with its host to cause disease, recent work suggests that clones might utilise  
78 distinct pathways to achieve this<sup>12</sup>. With such complexity and functional redundancy, this may  
79 explain why efforts to develop interventions, such as a protective vaccine, have not yet been  
80 successful.

81  
82 To better understand the pathogenicity of *S. aureus*, we developed a functional genomics  
83 approach to make use of the many thousands of clinical *S. aureus* isolates that have been  
84 sequenced<sup>12-14</sup>. This has enabled us to identify novel loci that affect the ability of *S. aureus* to  
85 both secrete cytolytic toxins and form biofilm<sup>12-14</sup>. One locus we found to be associated with  
86 the ability of the bacteria to secrete toxins was annotated as a putative membrane bound  
87 protein. Here we characterised the *in vitro* and *in vivo* properties of this protein, which we  
88 name MasA, demonstrating its pleiotropic effects on many established *S. aureus* activities  
89 including toxin production and resistance to innate immune mechanisms. We show  
90 that *masA* disruption results in membrane instability and dysregulation of iron homeostasis,  
91 which subsequently has a crippling effect on virulence and enhanced clearance in both a  
92 subcutaneous and a systemic model of infection. Given how well studied *S. aureus* is, that a  
93 locus with such a dominant effect on pathogenicity has remained until now undiscovered is  
94 somewhat surprising. A feature that is further compounded by the fact that there are  
95 homologues of this protein in many other human pathogens, including some as distantly  
96 related as the *Vibrio* genus, which suggests that defining the activity of this protein could have  
97 widespread implications for the understanding of the virulence of many bacterial pathogens.

98

99

## 100 RESULTS

### 101 The MasA protein positively affects the production of cytolytic toxins by *S. aureus*.

102 In previous work we found an association between a gene with the locus tag SATW20\_23930  
103 in the TW20 MRSA background and the ability of clinical strains to lyse human cells<sup>13</sup>. We  
104 have named the gene *masA* for membrane active stabiliser, as our data (presented later)  
105 suggest it plays a critical role in the membrane stability of the bacteria. With the availability of  
106 a transposon library in the USA300 MRSA background, we sought this gene and found that it  
107 was mis-annotated in the FPR3757 background as intergenic between SAUSA300\_2212 and  
108 SAUSA300\_2213<sup>15</sup>. We were however able to obtain transposon mutants in this region from  
109 the Nebraska Transposon Mutant Library<sup>16</sup>, where we found that inactivation of this gene  
110 reduced the ability of the bacteria to lyse THP-1 cells, which is an immortalised cell line that  
111 is sensitive to the majority of the cytolytic toxins expressed by *S. aureus*<sup>13,14</sup> (Fig. 1A). This  
112 effect on toxicity was complemented by expressing the *masA* gene from an inducible promoter  
113 on the pRMC2 plasmid<sup>17</sup> (Fig. 1A). To confirm the effect was not specific to this genetic  
114 background we transduced the transposon insertion into a genetically distinct methicillin  
115 sensitive *S. aureus* (MSSA) strain, SH1000<sup>18</sup>, where again it resulted in the loss of cytolytic  
116 activity for the bacteria (fig. 1B). The effect on toxicity was further confirmed on A549 cells  
117 (Fig. 1C) and human red blood corpuscles (Fig. 1D) which contain the additional receptors for  
118 alpha toxin and PVL, demonstrating the widespread effect the loss of this protein has on  
119 cytolytic toxin secretion by both MRSA and MSSA.

120

121 We next quantified the effect the inactivation of MasA has on the expression of several toxins  
122 to confirm whether its activity was specific to a single *S. aureus* toxin or had a more general  
123 effect. In both the JE2 and SH1000 background the inactivation of *masA* resulted in a  
124 decrease in alpha toxin secretion as demonstrated by western blotting of bacterial supernatant  
125 (Fig. 1E and Supplementary Fig. 1). There is also a reduction in the secretion of several of the  
126 phenol soluble modulins, including delta toxin which was determined by HPLC-MS (Fig. 1F).  
127 For both alpha toxin and the PSMs the effect of the inactivation of *masA* was more pronounced

128 in the SH1000 background. Given the effect on the production of all these toxins we  
129 hypothesised that the effect of the inactivation of *masA* could be mediated by repression or  
130 lack of activation of the major regulator of toxin expression, the accessory gene regulatory  
131 (Agr) quorum sensing system. To test this, we quantified the transcription of the regulatory  
132 RNA effector molecule of the Agr system, *rnaIII*, and found this to be significantly lower in the  
133 *masA* mutants, explaining the effect on toxicity we have observed (Fig. 1G).

134

135 To better understand the activity of this gene we examined both its genomic location and the  
136 likely cellular location of the encoded protein. The *masA* gene is situated between a  
137 hypothetical protein and an AcrB/AcrD/AcrF family protein (Supplementary Fig. 2A). To  
138 examine the role of the genes located to either side of the *masA* gene (Fig. 1A), we quantified  
139 the toxicity of transposon mutants in these genes in both the JE2 USA300 MRSA and SH1000  
140 MSSA backgrounds, and found there to be no effect, with the exception of a slight reduction  
141 in toxicity for NE42 (SAUSA300\_2212) in the JE2 background (Supplementary Fig. 2B). We  
142 also performed western blots to quantify alpha toxin production and extracted the PSMs from  
143 culture supernatants (Supplementary Fig. 2C and D) and found these activities were only  
144 affected in the *masA* mutant, suggesting that the genes to either side of *masA* play a minimal  
145 role in the effect of MasA on cytolytic toxin production. To understand the potential cellular  
146 localisation of the translated protein, we used the protein structure predicting software  
147 Protter<sup>19</sup>, which suggests that MasA is a membrane bound protein with four transmembrane  
148 domains, both the C and N terminus are predicted to be exposed to the outside on the  
149 membrane and it lacks a recognised signal sequence (Fig. 1H).

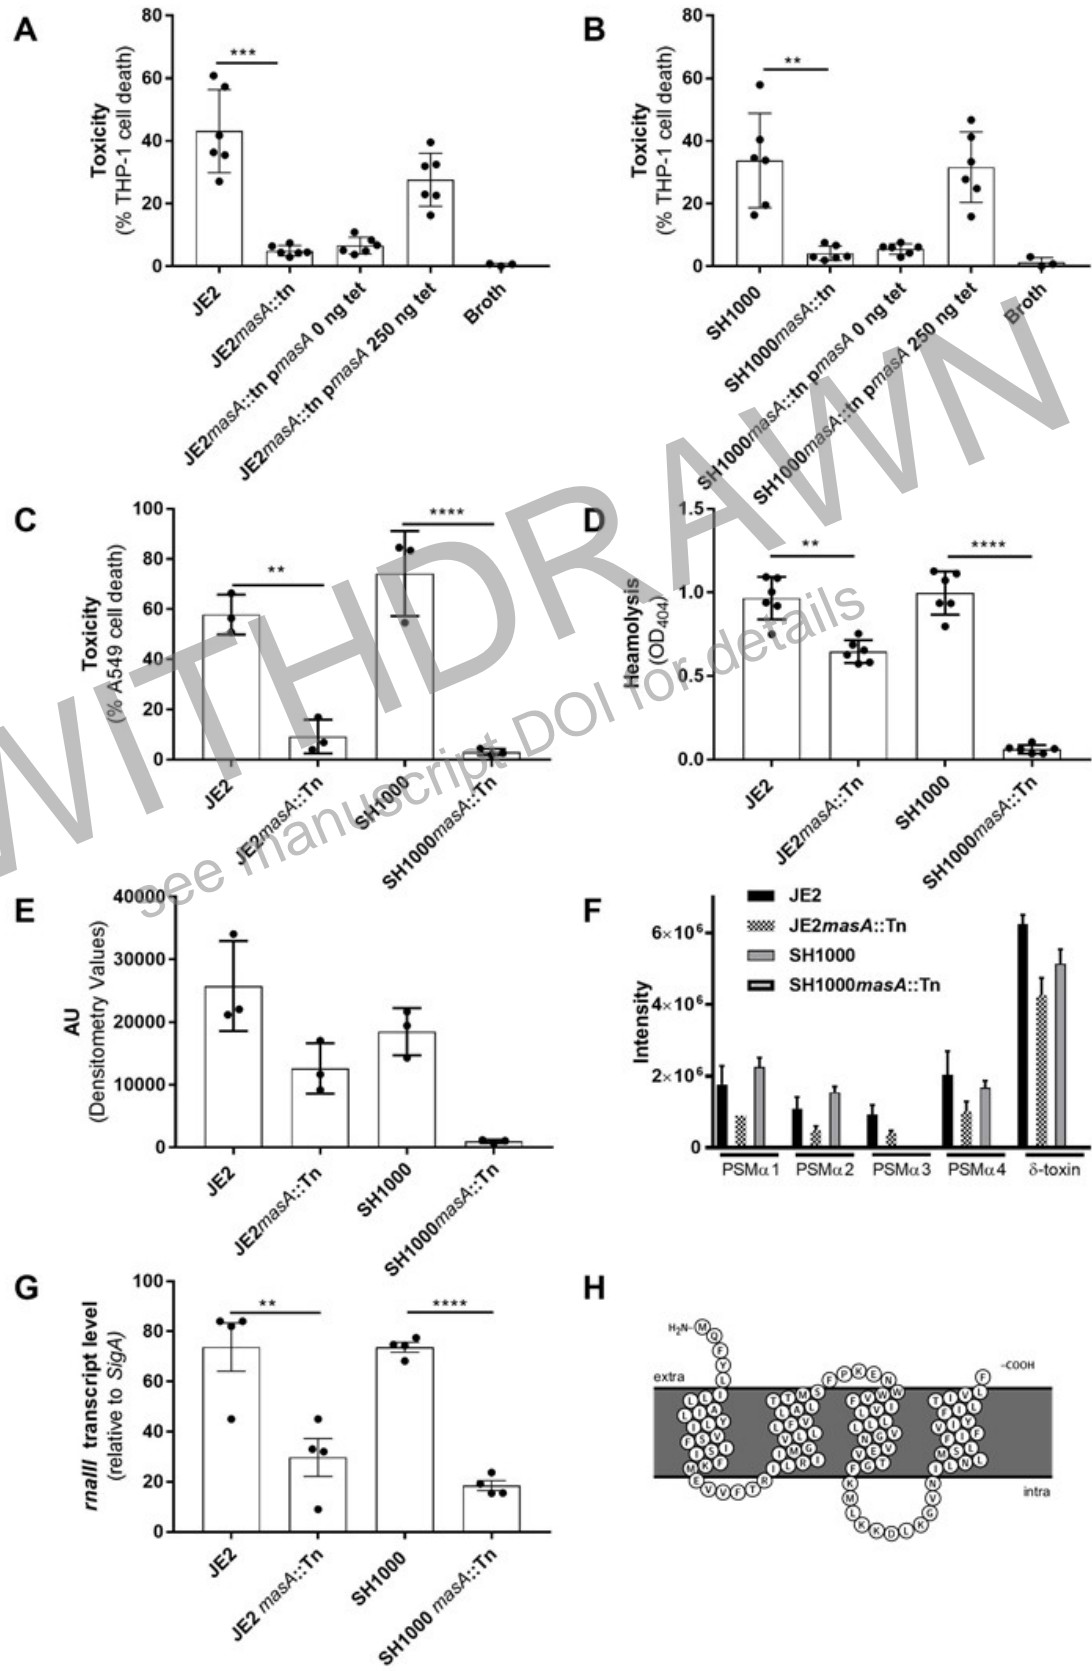

150

151 **Figure 1**

152 Inactivation of the *masA* gene results in a loss of toxicity (cytolytic activity) for *S. aureus*. In  
153 both the JE2 (A) and SH1000 (B) backgrounds the inactivation of *masA* resulted in a loss of  
154 cytolytic activity represented by a significant decrease in cell death. The loss of cytolytic  
155 activity was complemented in both backgrounds by expressing the *masA* gene from a plasmid  
156 (*pmasA*) (A and B). Furthermore, the inactivation of *masA* resulted in a loss of toxicity to a  
157 lung epithelial cell line (A549) (C) and human red blood corpuscles (D) in both the JE2 and  
158 SH1000 backgrounds. Inactivation of *masA* also resulted in a reduction in alpha toxin  
159 secretion in both backgrounds, determined by Western blot. Densitometry values for triplicate  
160 blots are shown (E). (F) The effect of the inactivation of *masA* on secretion of PSMs was  
161 quantified by HPLC, where the secretion of delta toxin was the most affected in both  
162 backgrounds ( $p < 0.001$ ). (G) The activity of the Agr system is repressed by the inactivation of  
163 *masA* as illustrated by qRT-PCR quantification of *malII* transcription. Statistics were  
164 performed using the Student's paired *t*-test and significance was determined as  $< *0.05$ ;  
165  $**0.01$ ;  $***0.001$ .  
166

### 167 **The MasA protein contributes to the ability of *S. aureus* to protect itself from the innate** 168 **immune system.**

169 As we worked with the *masA* mutant strains, we observed the colonies were less golden in  
170 colour than either wild type strain. This characteristic colour for *S. aureus* is a result of the  
171 production of a carotenoid pigment called staphyloxanthin, which has been shown to play a  
172 role in the intra-cellular survival of the bacteria<sup>20</sup> as well as contributing the membrane rigidity  
173 and the ability of the bacteria to protect themselves from elements of the innate immune  
174 system such as antimicrobial peptides and fatty acids<sup>21</sup>. We quantified staphyloxanthin  
175 production and found that in both *S. aureus* backgrounds the *masA* mutants produce  
176 significantly less of this protective pigment (Fig. 2A).

177  
178 To examine whether this loss in staphyloxanthin production was sufficient to affect the ability  
179 of the bacteria to defend itself from aspects of the innate immune system, we quantified the  
180 ability of the bacteria to withstand the membrane damaging effects of human defensin-1 and  
181 oleic acid. The inactivation of *masA* in both *S. aureus* backgrounds significantly impaired their  
182 ability to survive exposure to these elements (Fig. 2B and C). To examine whether this was  
183 due to a difference in the stability of lipid bilayer we also examined the sensitivity of the  
184 bacteria to the surfactant activity of sodium dodecyl sulphate (SDS), where again we found  
185 that the mutants were significantly impaired in protecting themselves (Fig. 2D). As  
186 staphyloxanthin has also been shown to confer protection to *S. aureus* during phagocytosis,



187 we investigated the bacteria's ability to survive inside macrophages (PMA differentiated THP-  
188 1 cells) (Fig. 2E) and human blood (Fig. 2F). In both *S. aureus* backgrounds the mutant  
189 survived less well than the wild type strains. As membrane integrity has also been attributed  
190 to staphyloxanthin<sup>21</sup>, we determined whether this was also affected in the MasA mutants.  
191 Bacteria were cultured overnight and stained with propidium iodide (PI) to assess membrane  
192 integrity via FACS (Fig. 2G and H). The shift in PI staining for the *masA* mutants indicates a  
193 reduced membrane integrity compared to the wild type strains. As such it is clear that in  
194 addition to the contribution MasA makes to toxin production, it also contributes to membrane  
195 integrity and the ability of the bacteria to protect itself from the host's immune response.  
196

WITHDRAWN  
see manuscript DOI for details

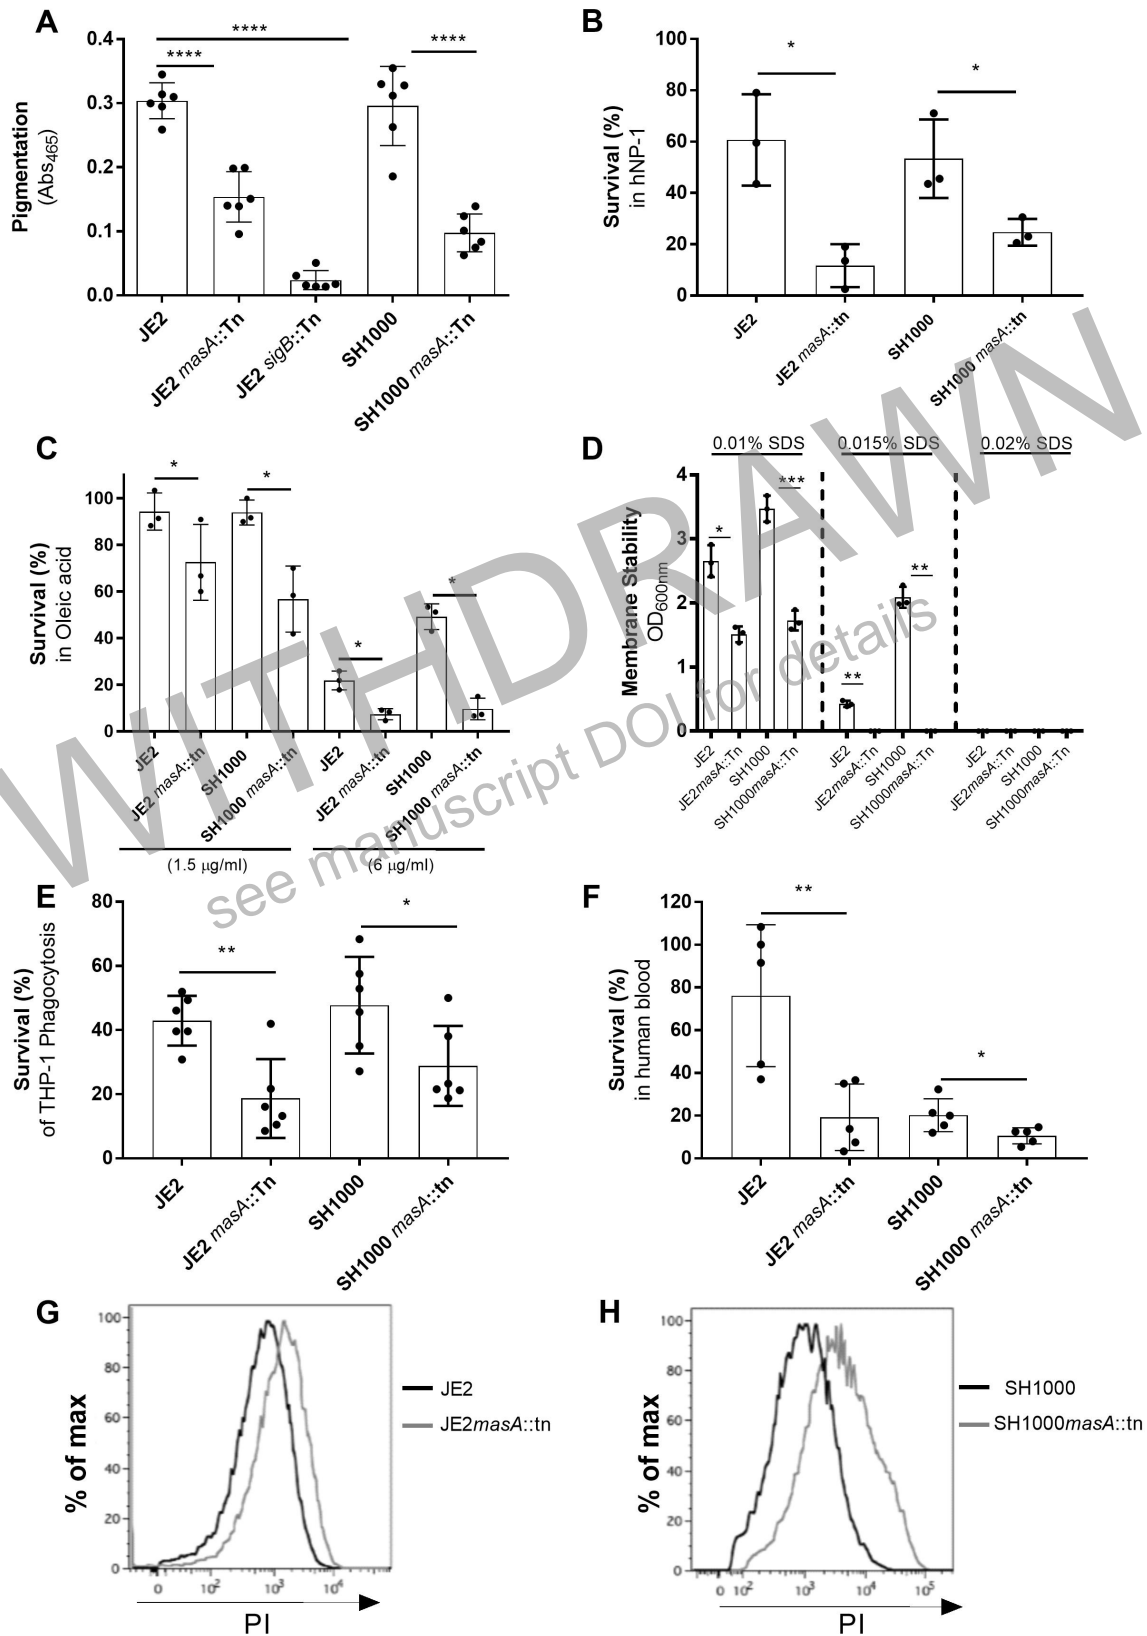

197

198 **Figure 2**

199 MasA confers protection against aspects of innate immunity (A) Inactivation of *masA* results  
 200 in decreased staphyloxanthin production in both *S. aureus* backgrounds. (B) Survival of *S.*  
 201 *aureus* upon exposure to the human neutrophil defensin-1 (hNP-1) was reduced in the *masA*

202 mutants in both *S. aureus* backgrounds. (C) Survival of *S. aureus* upon exposure to oleic acid  
203 was reduced in the *masA* mutants in both *S. aureus* backgrounds. (D) Survival of *S. aureus*  
204 upon exposure to SDS was reduced in the *masA* mutants in both *S. aureus* backgrounds. (E)  
205 Survival of *S. aureus* following phagocytosis is reduced in the *masA* mutants in both *S. aureus*  
206 backgrounds. (F) Survival in human blood is reduced in the absence of *masA* in both  
207 backgrounds. (G and H) FACS analysis of wild type and *masA* mutants in both backgrounds  
208 stained with propidium iodide (PI) demonstrates a decrease in membrane integrity in the *masA*  
209 mutants. Statistics were performed using one-way ANOVA or the Student's paired *t*-test and  
210 significance was determined as < \*0.05; \*\*0.01; \*\*\*0.001; \*\*\*\*0.0001.  
211

## 212 **The loss of MasA significantly attenuates the ability of *S. aureus* to cause disease.**

213 The loss of the Agr system has been shown in several models of infection to attenuate the  
214 pathogenicity of *S. aureus*. However, the MasA mutants are not only impaired in the activation  
215 of the Agr system they are also less able to protect themselves from host immunity. To  
216 examine the effect the loss of both offensive and defensive capabilities has *in vivo*, we utilised  
217 a murine subcutaneous infection model and compared the *masA* mutant to both the wild type  
218 JE2 strain and an *agrB* mutant. Photographs of the appearance of the abscesses were  
219 captured daily (Fig. 3A), and both the bacterial density in skin punch biopsies (Fig. 3B) and  
220 the abscess lesion area (Fig. 3C) were compared for all three strains. As demonstrated  
221 previously<sup>10</sup>, the loss of the Agr system significantly attenuates the ability of *S. aureus* to cause  
222 infection. However, the *masA* mutant was significantly more attenuated than the *agrB* mutant  
223 in terms of both abscess lesion area and tissue bacterial burden in our murine subcutaneous  
224 infection model, demonstrating the considerable effect the loss of both toxicity and immune  
225 evasion capacities have on pathogenicity *in vivo*.

226

227 Given the importance of both toxin production and immune defence during invasive infection  
228 we also compared the pathogenicity of the *masA* mutant in sub-lethal murine sepsis model.  
229 Six and 24hrs after tail vein inoculation the density of bacteria in blood, kidneys and spleen  
230 were quantified. In blood after 6 hours both the *agrB* and *masA* mutants were more effectively  
231 cleared compared to the wild type strain, and by 24hrs all three strains were barely detectable  
232 (Fig. 3D). In both the spleens and livers at both six and 24 hours post infection the wild type  
233 strain was more abundant, and comparable bacterial burdens were detected for the *masA* and

234 *agrB* mutant strains (Fig. 3E, F). In the kidneys at 6hrs post infection both the wild type and  
235 *agr* mutant were present at similar levels, however we were unable to detect any *masA* mutant  
236 cells. By 24hr in the kindeys we were able to detect the *masA* mutant and they were at an  
237 equivalent burden when compared to the *agr* mutant, however both mutants were at a  
238 significantly lower level when compared to the wild type strain (Fig. 3G). This suggest that  
239 both mutant were impaired in their ability to establish an infection in the kidney, where the  
240 *masA* mutant appears to have a greater impairment in its ability to disseminate to the kidneys  
241 during the early stages of infection, possibly as a result of its increased sensitivity to the  
242 membrane attacking elements of the innate immune system.

WITHDRAWN  
see manuscript DOI for details

**A**

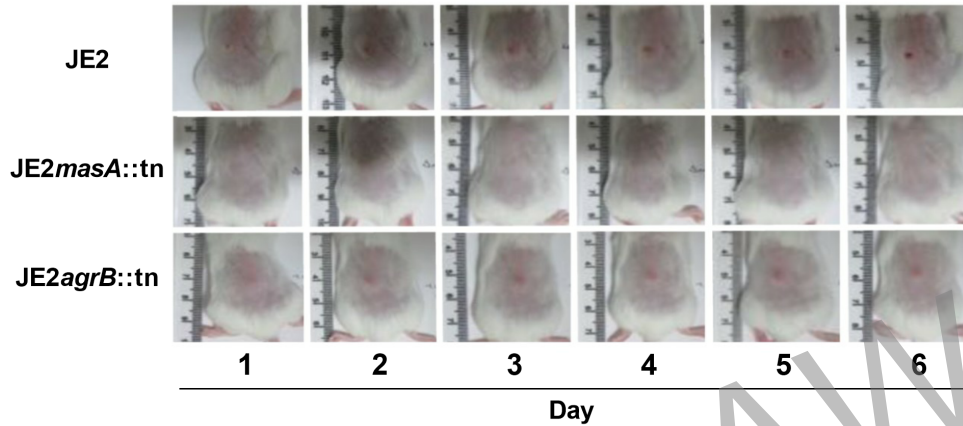

**B**

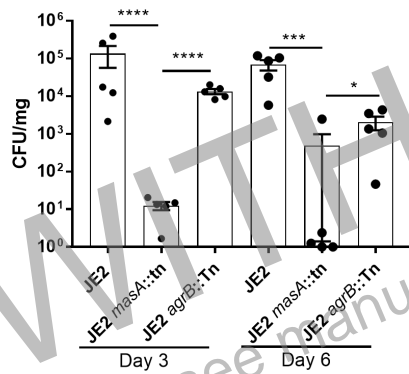

**C**

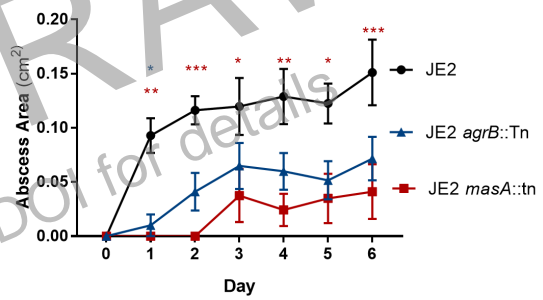

**D**

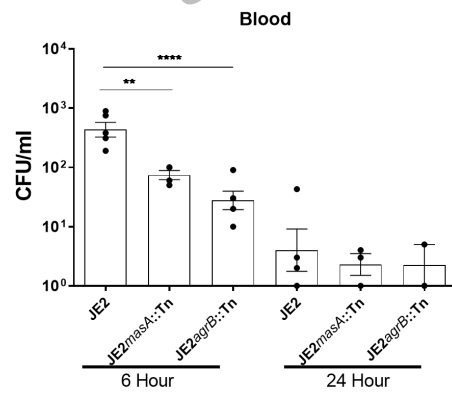

**E**

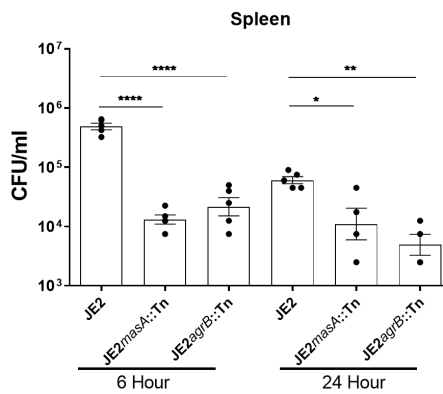

**F**

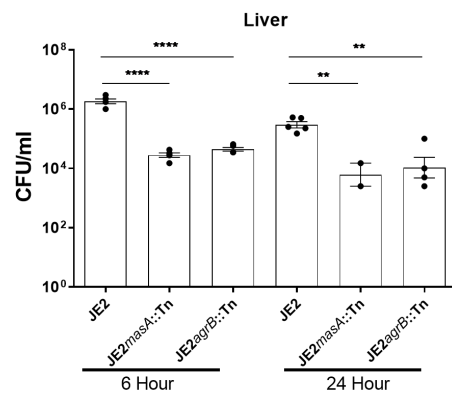

**G**

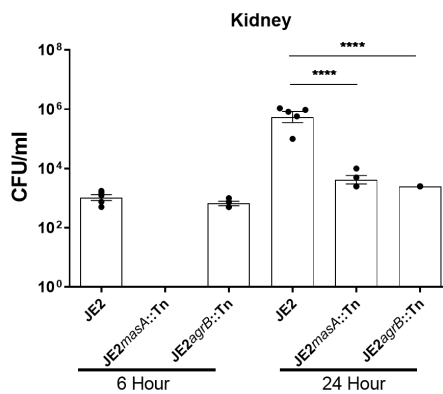

243

244 **Figure 3**

245 The inactivation of *masA* affects the ability of *S. aureus* to cause disease in both a superficial  
246 and systemic infection model. Balb/c mice were infected subcutaneously with  $2 \times 10^7$  CFU wild  
247 type (JE2), and isogenic strains in which the *masA* and *agrB* genes were inactivated. (a)  
248 Abscess lesion area was assessed daily and representative lesions from the dorsal area of  
249 mice from each group are shown, and results are expressed as total lesion size ( $\text{cm}^2$ )  $\pm$  SEM  
250 (b). The bacterial burden in the skin was assessed by viable counting at 3 and 6 days post-  
251 infection (c). (d-g) C57 mice were inoculated via tail vein injection of  $2 \times 10^7$  CFU the wild type  
252 JE2 *S. aureus* strain and the *masA* and *agrB* mutants. (d-g) The tail vein of mice were  
253 inoculated with a sub-lethal dose of the wild type JE2 *S. aureus*. Blood (d), spleens (e), livers (f) and  
254 kidneys (g) were harvested at 6 and 24 hours post infection and the burden of bacteria in each  
255 sample was quantified. For the superficial infection, n=10 representative of 2 independent  
256 pooled experiments. For the systemic infection, n=5 of one independent experiment. Statistics  
257 were performed using One Way Anova with a Turkey post-test (superficial) and Sidak's  
258 multiple comparison test (systemic) and significance was determined as  $< *0.05$ ;  $**0.01$ ;  
259  $***0.001$ ;  $****0.0001$ .

260

### 261 **Iron homeostasis is affected in the absence of MasA.**

262 Given the relatively small size of the MasA protein (105 residues), and that the majority of it  
263 (73%) is predicted to be embedded in the bacterial membrane, we sought to determine how  
264 its loss can have such a detrimental effect on the pathogenicity of *S. aureus*. We adopted a  
265 proteomic approach and used tandem mass tagging coupled to mass spectroscopy (TMT-  
266 MS<sup>22</sup>) on whole cell lysates of the JE2 strain and its *masA* mutant. Using the *S. aureus* NCTC  
267 8325 proteome as our reference we were able to detect and quantify the abundance of 1149  
268 proteins. Using a 2-fold difference in abundance as our cut-off for biological significance we  
269 found 63 proteins differentially abundant in the *masA* mutant compared to the wild type strain  
270 (Supplementary Table 1). Of these differentially abundant proteins, of note was that many  
271 proteins involved in both the uptake (e.g. *IsdB* and *IsdC*<sup>23</sup>) and efflux (*HrtA* and *HrtB*<sup>24</sup>) of  
272 heme-iron were affected (Table 1), suggesting that the ability of the bacteria to control iron  
273 homeostasis may be impaired in the *masA* mutant. To explore this further we compared the  
274 levels of intracellular iron in the wild type and mutant strains using the antibiotic streptonigrin  
275 which causes nucleic acid damage in the presence of iron<sup>25</sup>, and as such quantifying the level  
276 of sensitivity of a bacterium to this antibiotic can be used as an indication of the relative  
277 amounts of iron present in the bacterial cytoplasm. In both the JE2 and SH1000 backgrounds  
278 the *masA* mutants had higher levels of intracellular iron, indicated by increased sensitivity to  
279 streptonigrin when compared to their wild type strains (Fig. 4A and B).

280

281 *S. aureus*, like many other pathogens, utilizes heme as a source of iron during infection<sup>26</sup>. It  
282 can either capture hemoglobin and release heme from this, or synthesise it endogenously  
283 using the enzymes encoded by the *hem* locus<sup>27</sup>. In the *masA* mutant, while the increased  
284 abundance of the Isd heme uptake system proteins might explain the observed increased  
285 levels of intracellular iron, this system is specific to heme, and TSB, the medium used to grow  
286 the bacteria contains negligible amounts of this. The Hrt efflux system is also highly specific  
287 for heme, and that we see an increased expression of this suggest that it is responding to  
288 increasing levels of heme-iron within the bacterial cells. However, as its function is to pump  
289 heme out of the cells, that we see increased iron level despite increased expression of this  
290 efflux system suggest that its activity may be impaired. Interference in the stoichiometry of  
291 ATPases and their permeases has been shown previously to significantly affect the activity of  
292 *S. aureus* efflux systems<sup>28</sup>. In the *MasA* mutant we see an almost 18-fold increase abundance  
293 of the HrtB protein (the permease) but only a 2.7-fold increase abundance of the HrtA protein  
294 (the ATPase), which is intriguing, given that these genes are co-transcribed. It is therefore  
295 possible that the observed differences in relative abundance of the Hrt proteins may be  
296 affecting its efflux activity, which would consequently affect the ability of the bacteria to reduce  
297 their intracellular heme levels.

298

299 To examine whether the activity of the Hrt system was impaired in the *masA* mutant, despite  
300 the HrtA and HrtB proteins being more abundant, we developed an heme adaptation assay.  
301 The bacteria were grown overnight in either TSB or TSB supplemented with hemin, and these  
302 bacteria were then used to inoculate fresh TSB with increasing concentrations of hemin where  
303 the ability of the bacteria to adapt to this was determined by quantifying their density after 8  
304 hours of growth (Fig. 4C). Pre-exposure of the bacteria to hemin (in the overnight cultures)  
305 enabled the wild type bacteria to adapt to the increasing concentrations of hemin as illustrated  
306 by the higher density of the bacterial cultures after 8 hours of growth (Fig. 4D and E). However,  
307 in both backgrounds, the *masA* mutants were impaired in their ability to adapt to the presence  
308 of hemin. This suggests that despite the increased abundance of the Hrt proteins, the efflux

309 activity of this system is impaired, which provides an explanation for the increased intracellular  
310 iron concentrations observed above (Fig 4A and B).

311

312 **Table 1 Differentially regulated iron process proteins in the absence of MasA**

| <b>Accession<sup>#</sup></b> | <b>Protein Function Description</b>          | <b>Fold Change<sup>€</sup></b> | <b>p-Value<sup>*</sup></b> |
|------------------------------|----------------------------------------------|--------------------------------|----------------------------|
| Q2FVR0                       | Hemin transport system permease protein HrtB | 17.97 ↑                        | < 0.0001                   |
| Q2FVR1                       | Hemin import ATP-binding protein HrtA        | 2.7 ↑                          | 0.005                      |
| Q8KQR1                       | Iron-regulated surface determinant protein C | 2.56 ↑                         | 0.001                      |
| Q2FWZ8                       | Bacterial non-heme ferritin                  | 2.11 ↓                         | 0.0005                     |
| Q2FZF0                       | Iron-regulated surface determinant protein B | 2.08 ↑                         | 0.079                      |
| Q2G1Z3                       | Iron compound ABC transporter                | 2.06 ↑                         | 0.002                      |

313 <sup>#</sup>Accession corresponds to protein identifier in UniProt database.

314 <sup>€</sup>Fold change in the abundance of proteins in the masA mutant relative to the wild type strain  
315 in three independent experiments.

316 <sup>\*</sup>p-Value was calculated using the Student's *t*-test

317

318

319

320



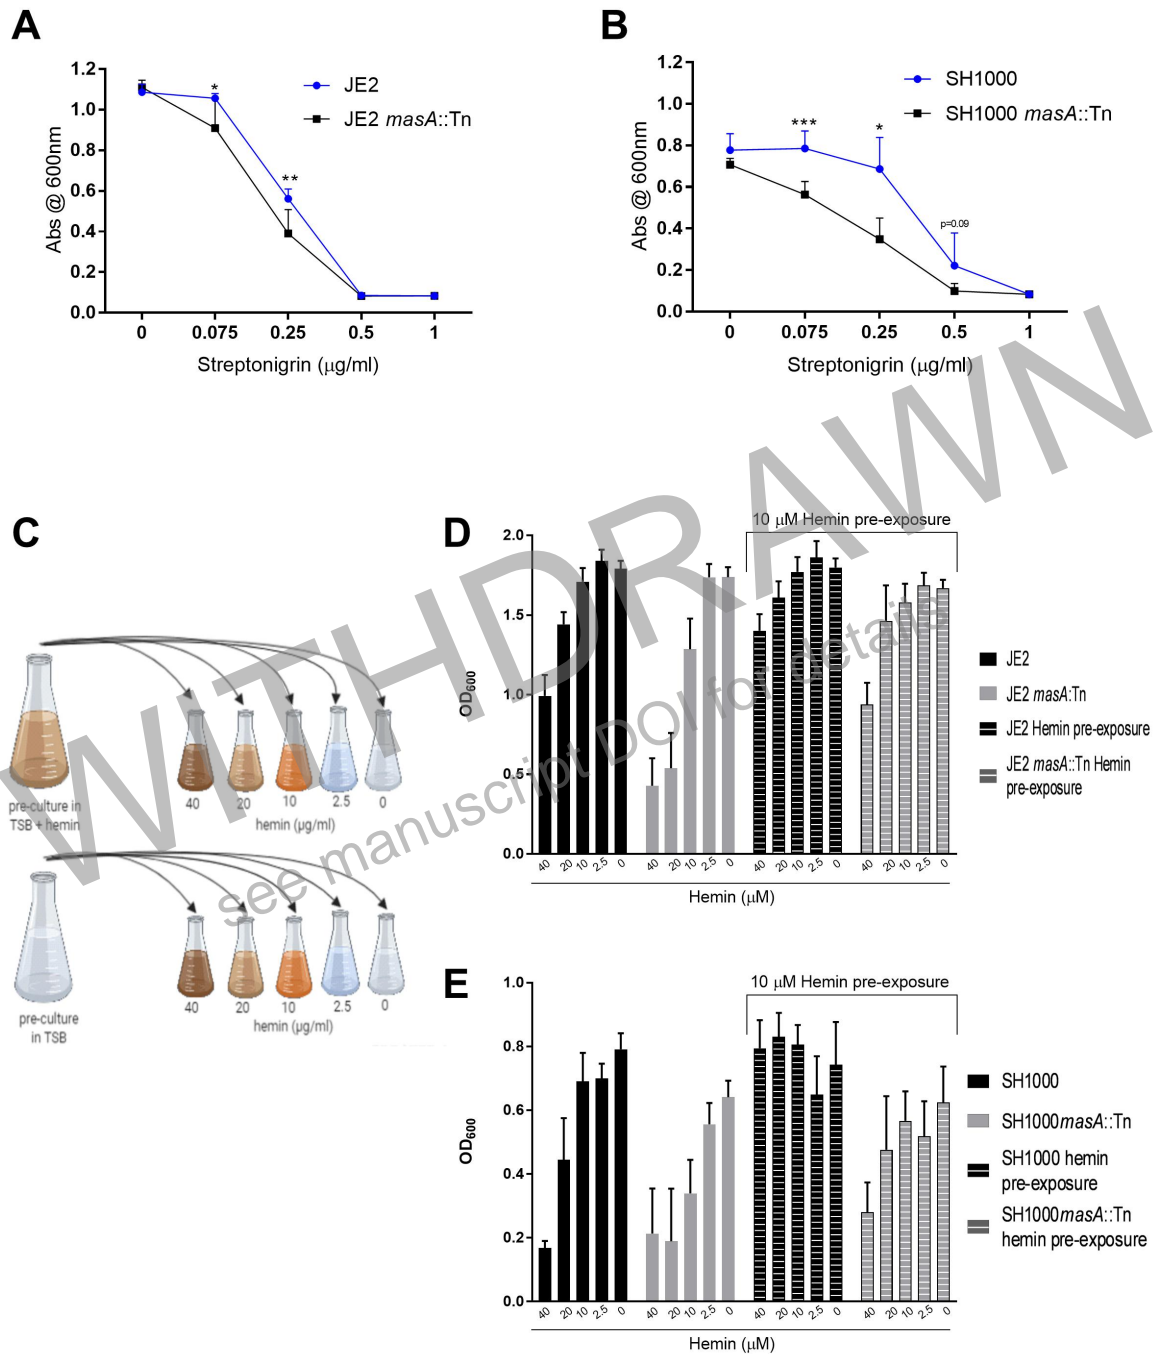

321  
322  
323  
324  
325  
326  
327  
328  
329  
330  
331

#### Figure 4

(a) Growth of both JE2 and SH1000 in the presence of streptonigrin was determined at 8 hours at various streptonigrin concentrations (A and B). Streptonigrin was consistently more effective at inhibiting the growth of *masA* deficient strains, indicating they have higher levels of intracellular iron. (C) To determine the role of *masA* in bacterial adaptation to hemin-rich environments, bacteria were cultured either in normal TSB, or TSB supplemented with moderate hemin. Bacteria were then sub-cultured into a range of hemin concentrations. Pre-culture in moderate hemin conferred an advantage for subsequent growth in high hemin concentrations in both JE2 and SH1000 backgrounds (striped bars D and E). The loss of *masA* was disadvantageous for adaption to high hemin environments (grey bars D and E). Statistics

332 were performed using the Student's paired *t*-test and significance was determined as < \*0.05;  
333 \*\*0.01; \*\*\*0.001.

334

335 **Increased intracellular iron concentrations affects the toxicity and immune evasion**  
336 **capabilities of *S. aureus*.**

337 Previous work on the Hrt system demonstrated that increased intracellular iron can affect  
338 protein secretion<sup>29</sup>. As such, we sought to determine whether the increased levels of iron that  
339 result from the loss of MasA could explain the loss of the toxicity and immune evasion  
340 capabilities of the mutants. To address this, we grew the wild type JE2 and SH1000 strains in  
341 TSB with increasing concentrations of hemin, where 10  $\mu$ M was the highest concentration we  
342 could use that did not affect the rates of bacterial growth upon first exposure. Using  
343 streptonigrin we demonstrated that although the bacteria can adapt to this, the higher the level  
344 of hemin in their growth media, the higher the level of heme-iron in their cytoplasm  
345 (Supplementary Fig. 3A and B). As this was comparable to the iron level we observed in the  
346 *masA* mutant, we harvested the bacterial supernatant and demonstrated that this resulted in  
347 a decrease in cytolytic activity as measure by THP-1 lysis in both backgrounds (Fig. 5A and  
348 B). Increasing levels of hemin resulted in decreased secretion of the PSM family of toxins  
349 (Supplementary Figure 3C and D). We also verified that as with the *masA* mutant, the effect  
350 the increased iron had on toxicity was mediated through the repression or lack of activation of  
351 the Agr quorum sensing system (Fig. 5C and D). Increased levels of intracellular iron also  
352 affected the level of staphyloxanthin produced by the bacteria (Fig. 5E and F). Together these  
353 data suggest that the effect the loss of MasA has on iron homeostasis is contributing to the  
354 effect we have observed in its offensive and defensive capabilities. There are however other  
355 as yet uncharacterised features involved here. We examined the toxicity of HrtA and HrtB  
356 mutants (which has altered intracellular heme levels) as well as a Fur (the ferric uptake  
357 regulator that is also required for heme homeostasis<sup>30</sup>) mutant in the JE2 background. While  
358 we observed a small drop in toxicity of the HrtB mutant, there was no difference between the  
359 HrtA or Fur mutants when compared to the wild type strain (Supplementary Figure 4),  
360 suggesting that as yet unidentified factors in addition to heme accumulation must be

361 contributing to the effects observed when MasA is inactivated. Further molecular  
 362 characterisation of the activity of MasA is currently underway.

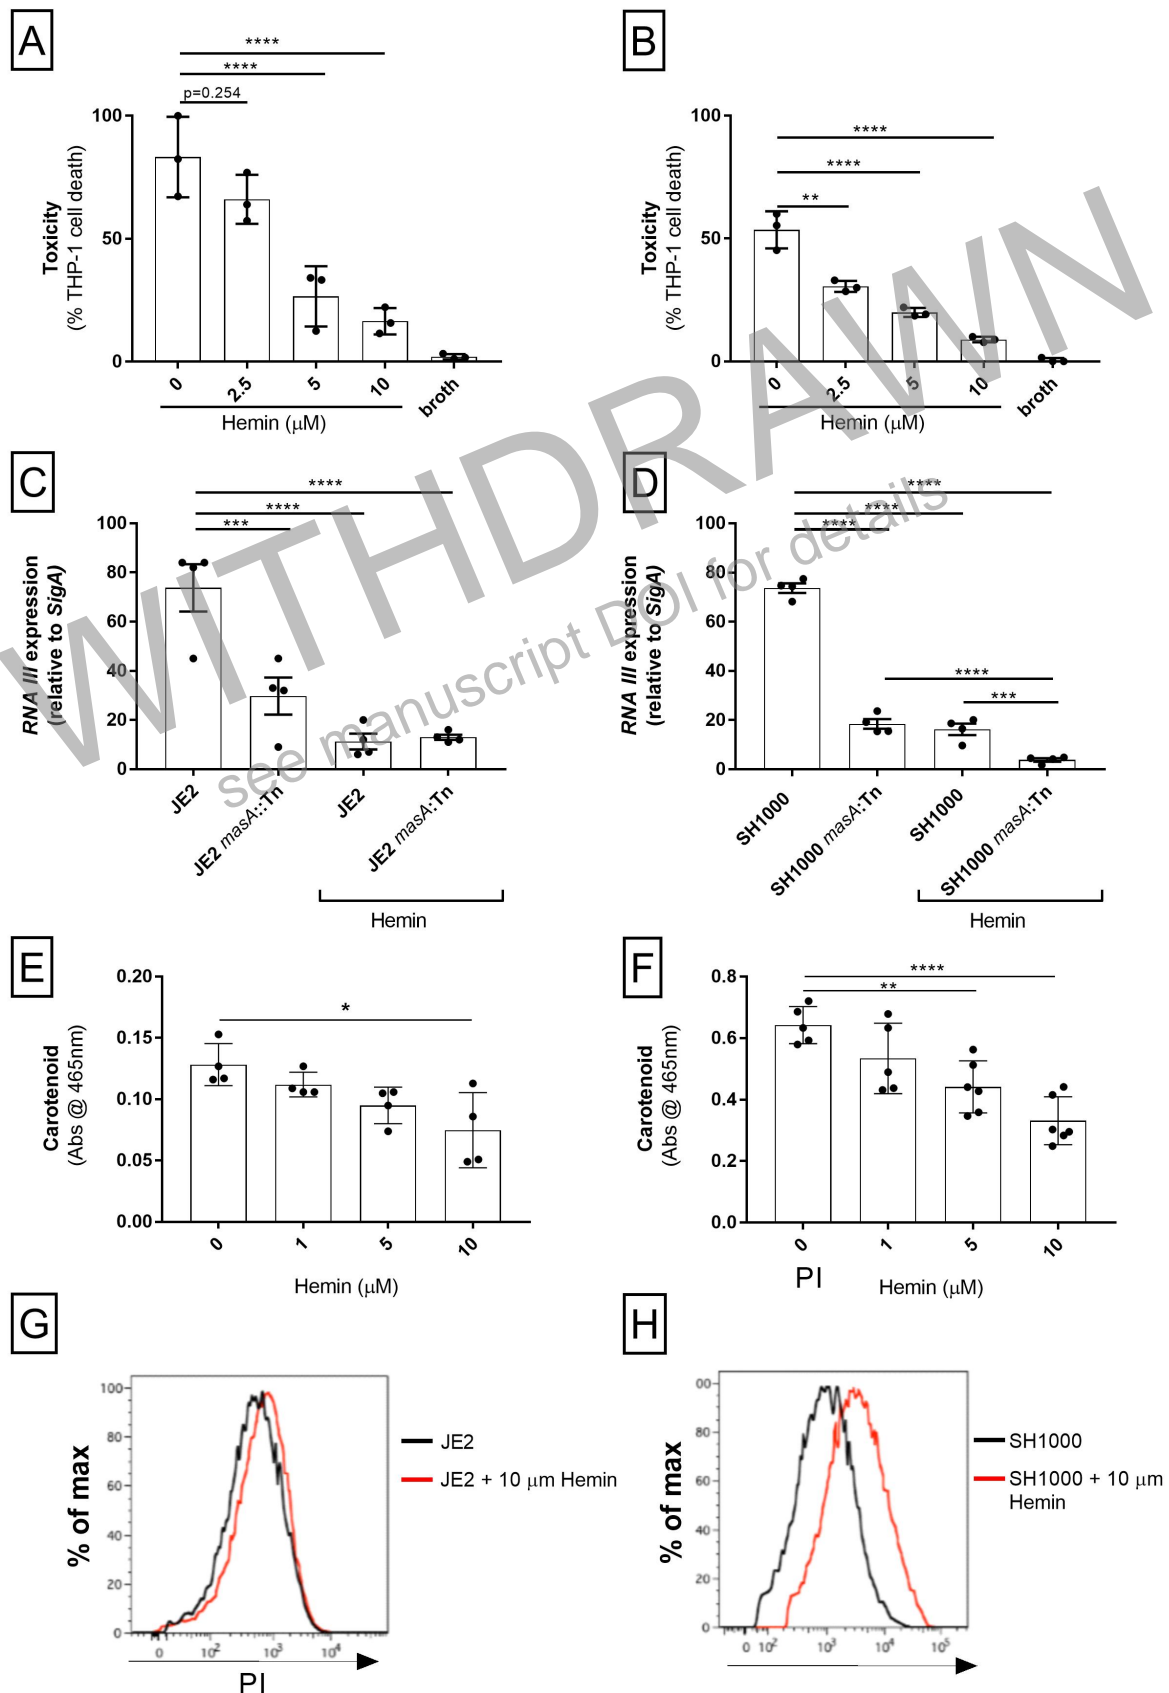

363

364  
365  
366  
367  
368  
369  
370  
371  
372  
373  
374  
375  
376  
377  
378

### Figure 5

When cultured in increasing concentrations of hemin, the ability of JE2 (**A**) and SH1000 (**B**) to cause toxicity in THP-1 cells is diminished in a concentration dependent manner. (**C**) Transcript levels of *malIII* are, compared to levels of *masA* deficient JE2 and SH1000, further diminished in both backgrounds when exposed to hemin (**C** and **D**). Carotenoid biosynthesis is also diminished during culture in additional hemin, and this effect was observed in a concentration dependent manner in both backgrounds (**E** and **F**). (**G** and **H**) Representative images of FACS analysis are shown. A shift in the PI signal for JE2 and SH1000 supplemented with hemin and stained with PI demonstrates a decrease in membrane integrity. Statistics were performed using the Student's paired *t*-test and significance was determined as < \*0.05; \*\*0.01; \*\*\*0.001.

379

### Discussion

As a major global cause of morbidity and mortality, many diverse strategies have been developed and tested to control and treat *S. aureus* infections. Vaccination, for example has been successfully used to control and reduce the incidence of many bacterial infections. However, despite significant investment and multiple diverse *S. aureus* components including toxins, surface expressed proteins and capsule being targeted, vaccines have provided no significant level protection when used in human trials<sup>31</sup>. Recent studies on populations of clinical isolates may provide an answer to some of these failures, where significant variability in the expression of toxins and capsule has been demonstrated<sup>12-14,32</sup>. The isolates not expressing the target would therefore evade the immune response elicited by the vaccine, affecting its coverage and effectivity. This population level variability in the expression of these virulence factors has only recently been demonstrated, and it's unlikely that these *S. aureus* components would have been considered good vaccine targets, were this information available at the time. So, it would appear that our lack of understanding of the complexity of the pathogenicity of *S. aureus* is hampering the development of an effective vaccine.

395

The *S. aureus* research field has benefitted greatly from the development of next generation sequencing technologies, with thousands of isolates having been sequenced to date. Given

398 the proportion of uncharacterised coding regions on the *S. aureus* genome is it perhaps  
399 unsurprising that we do not yet fully understand its pathogenicity. With many genes described  
400 only as encoding hypothetical proteins, or ascribed a putative function based on amino acid  
401 homology to other characterised proteins, it is clear we have much to learn about this microbial  
402 pathogen. In recent work we have developed a functional genomics approach to begin to bring  
403 genome sequence data and the study of *S. aureus* pathogenicity together<sup>12-14,28</sup>. In doing so  
404 we have identified several novel effectors of the ability of *S. aureus* isolates to secrete cytolytic  
405 toxins, one of which is MasA, a putative membrane bound protein. In two distinct *S. aureus*  
406 backgrounds we demonstrate the role this protein plays in both the ability of this pathogen to  
407 secrete cytolytic toxins and protect itself from several aspects of the innate immune system.  
408  
409 Although the precise activity of this protein has yet to be elucidated, we have summarised in  
410 figure 6 what we understand to date. The effect it has on the activity of the Hrt heme efflux  
411 system is such that intracellular levels of heme iron are elevated, and this contributes to some  
412 of the pathogenicity related phenotypes we have observed for the *masA* mutant. It is possible  
413 that given its likely membrane localisation that the MasA protein may be directly interacting  
414 and enhancing the activity of the Hrt proteins. However, were this the case we would expect  
415 to see the same effect on toxicity when we inactivate the Hrt system by mutagenesis, which  
416 we don't (Supplementary Fig. 4), suggesting additional or alternative activities for MasA. So  
417 although we can phenocopy the loss of MasA (with respect to toxicity and staphyloxanthin  
418 production) by increasing intracellular iron levels through the addition of hemin to the bacterial  
419 growth media, we don't see the same effect when we increase intracellular iron levels through  
420 the inactivation of the Hrt system.

421

422

423

424

425

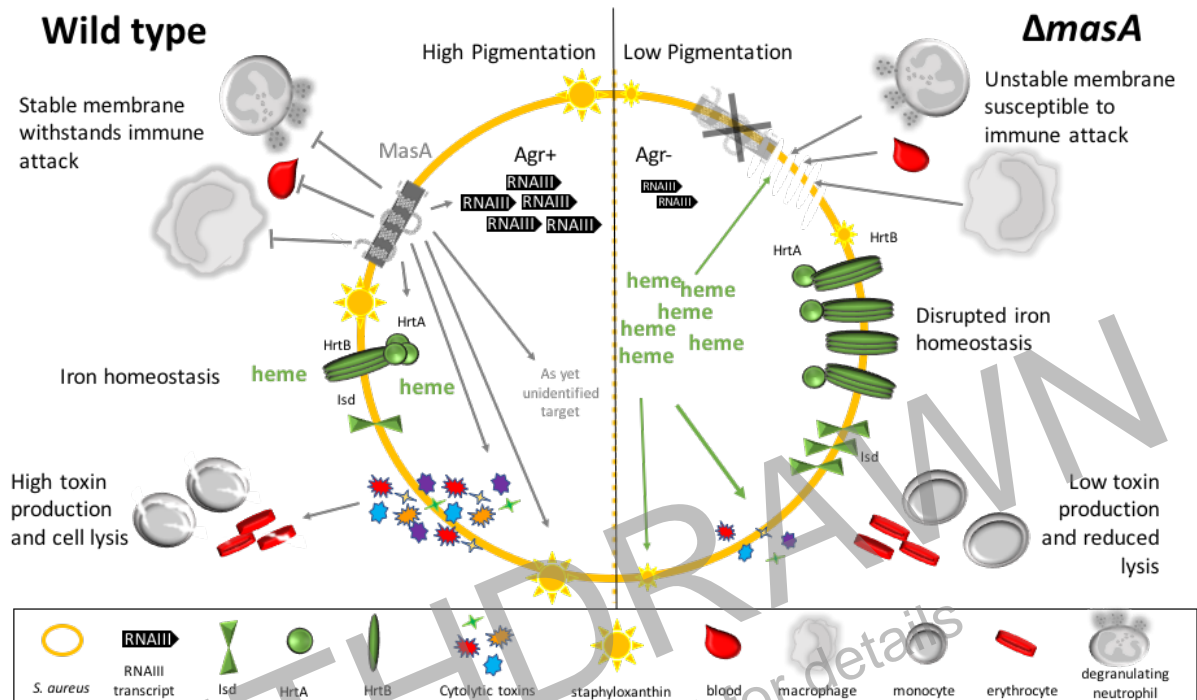

426

427 **Figure 6**

428 Summary of the effect the inactivation of the *masA* gene has on the bacterial cell. In the  
 429 absence of MasA the bacteria are unable to protect itself from membrane attack and  
 430 phagocytosis. The Agr system is not activated, which subsequently affects the  
 431 production of cytolitic toxins. The abundance and stoichiometry of the Hrt proteins is also  
 432 affected in the *masA* mutant, which affects heme-iron homeostasis, and this partially  
 433 contributes to the toxic and immune susceptibility phenotypes reported here.

434

435

436 Our current hypothesis is that with such a large proportion of the protein predicted to be

437 embedded in the bacterial membrane, and that the gross phenotypic changes to its toxic and

438 immune evasion capabilities are mediated by other diverse membrane bound molecules (i.e.

439 AgrB, AgrC, staphyloxanthin and HrtB) that it may have a more general role in stabilising the

440 bacterial membrane so that all of these diverse proteins can perform optimally. In support of

441 this more generalist activity, we found homologues of MasA in all staphylococcal species, but

442 also in other diverse bacterial genera including *Streptococcus pneumoniae* and the Gram

443 negative *Vibrio cholerae*. An alignment of these MasA homologues indicates a high level of

444 conservation suggesting it evolved before these bacteria diverged (fig. 7). While

445 *Streptococcus pneumoniae* has a HrtB protein, *Vibrio cholerae* doesn't, suggesting that the role

446 of MasA is not limited to interacting with this heme efflux system. Future work to elucidate the

447 molecular details of the activity of MasA is currently underway, and given the widespread

448 prevalence of this protein, this work is likely to have widespread implications to our  
449 understanding of the biology of many diverse bacteria.

450

```
S. pseudo. -----MYLVVAYISIFKMRIMPKLLRVIMGLLLIIVVATSLVYYPASTWWVFVLLILLIGNVEITAFKHSKNDKGVRLNMMSLF ILVIVIVLVAVFI 95
Strep. pneumo. -----VVVTRILRIIMGVLLLFVLALTTMSFPKENWVFI VLLLLLVGNVEVTGFKMLKDKLGVNINLNLMSLFIFVIYFILTIVLF 81
S. aureus -----MQFYLLALLIYLVISIFKMEVVFTRILRIIMGVLLLFVLALTTMSFPKENWVFI VLLLLLVGNVEVTGFKMLKDKLGVNINLNLMSLFIFVIYFILTIVLF 105
Vibrio cholerae -----MEVVFTRILRIIMGVLLLFVLALTTMSFPKENWVFI VLLLLLVGNVEVTGFKMLKDKLGVNINLNLMSLFIFVIYFILTIV- 81
S. argenteus -----MQFYLLALLIYLVISIFKMEVVFTRILRIIMGVLLLFVLALTTMSFPKENWVFI VLLLLLVGNVEVTGFKMLKDKLGVNINLNLMSLFIFVIYFILTIVLF 105
S. pettenkoferi -----MQLYLILLPLIYLVISIFKMTITFTILRIIMALLLFFVVALTTVSPFPAANWVFI VLLLLLVGNVEVTGFKHSKDKKGVRLNINLTVILFVIYILTIIVMY 105
S. cohnii -----MQLYLIFLPVLYLVISYISIFKMTIITRILRIIMSLLLLFVVAITTLSPFPAINWVFI VLLLLLVGNVEVTGFKHSKDKKQAVQIINLMSVILFVIYVILTIIVLY 105
S. lugdunensis MIGSGLERKSKMQLYLILLPLIYLVISYISIFKMTIITRILRIIMGVLLLFVVAITTLQFPFPAENWVFI VLLLLLVGNVEVTGFKAIKQDRKGLLILNLLTLLLYIVYILTIIVMY 116
S. warneri -----MKLYLILLPLIYLVISYISIFKMSIFTRILRIIMAVLLLFVVAITTLQFPFPAENWVFI VLLLLLVGNVEVTAFKSLKNDKGVNINLNLISGLF----- 94
S. haemolyticus -----MKLYLILLPLVLYLVISYISIFKMSIFTRILRIIMGVLLLFVVAITTLQFPFPAENWVFI VLLLLLVGNVEVTAFKALKHDAKAVSILNLSVILFVIYIILTIIVMY 105
: : **:*:*:*:*:* : : * .***** * :.*:*:*.* * * * : **::: : :
```

451

## 452 **Figure 7**

453 Alignment of the amino acid sequence of MasA homologues in other staphylococcal species,  
454 and other bacterial genera. The length of the predicted proteins are indicated on the right. The  
455 \* indicates positions which have a single, fully conserved residue, while : indicates  
456 conservation between residues with strongly similar properties.

457

458

459 While the study of small numbers of ‘lab strains’ has enabled us to gain a level of  
460 understanding of *S. aureus* pathogenicity, we believe our work demonstrates the potential for  
461 vastly increasing our understanding by adopting a population level approach. Perhaps the  
462 biggest problem with tackling this pathogen is that the vast majority of its interactions with  
463 humans is as a commensal organism, so it is well adapted to exposure to the aspect of our  
464 immune system present in our nasal mucosa. As such, a single protein that affects both  
465 virulence and immune evasion, and is present across diverse genera of pathogenic bacteria  
466 represents a promising target for future broad-spectrum therapeutic intervention strategies.

467

## 468 **Acknowledgements**

469 This work was funded by a BBSRC Grant awarded to RCM, an Intramural Research Program  
470 (NIAD, NIH) awarded to MO, a PhD studentship funded by the Saudi Arabian Government  
471 awarded to AA, and both RCM and RMM are Wellcome Trust funded Investigators. Thanks  
472 also go to Borko Amulic and Fernando M. Ponce-Garcia for providing the human erythrocytes,  
473 and Alanna Kelly and Jenny Mannion for assistance with mice culling.

474

## 475 **Materials and Methods**

## 476 **Ethics Statement**

477 Peripheral blood from healthy donors was acquired in accordance with the Declaration of  
478 Helsinki and approved by Research Ethics Committee (REC 18/EE/0265). All animal  
479 experiments were conducted in accordance with the recommendations and guidelines of the  
480 health product regulatory authority (HPRA), the competent authority in Ireland and in  
481 accordance with protocols approved by Trinity College Dublin Animal Research Ethics  
482 Committee.

483

#### 484 **Bacterial strains and growth conditions**

485 A list of *S. aureus* strains used in this study can be found in Table 1. *S. aureus* strains were  
486 routinely grown in Tryptic Soy broth (TSB), or Brain Heart Infusion (BHI) where indicated.  
487 Overnight cultures were used to inoculate fresh media at a dilution of 1:1,000 and then grown  
488 for 18 h at 37 °C in air with shaking (180 rpm). For transposon mutants, erythromycin (5 µg/mL)  
489 was added to the growth medium. For complementation with pRMC2 plasmid (14) containing  
490 the *masA* gene (*pmasA*), anhydrous tetracycline (50-200 ng/mL) was included in the growth  
491 medium. The toxin-containing supernatant for each bacterial strain was harvested by  
492 centrifugation at 10,000 x *g* for 10 min. Hemin (CAS 16009-13-5) and Streptonigrin (CAS  
493 3930-19-6) were included in culture media at the indicated concentrations.

494

495 **Table 2:** Bacterial strains used in this study.

| Strain                               | Description                                                                                          | Reference  |
|--------------------------------------|------------------------------------------------------------------------------------------------------|------------|
| JE2                                  | USA300; CA-MRSA, type IV SCC <i>mec</i> ; lacking plasmids p01 and p03; wild-type strain of the NTML | 16         |
| JE2 <i>agrB</i> ::Tn                 | Accessory gene regulator B ( <i>agrB</i> ) transposon mutant in JE2                                  | 16         |
| JE2 <i>masA</i> ::Tn                 | <i>masA</i> transposon mutant in JE2                                                                 | 16         |
| JE2 <i>masA</i> ::Tn <i>pmasA</i>    | <i>masA</i> transposon mutant complemented with <i>masA</i> gene housed in pRMC2 expression plasmid  | This study |
| SH1000                               | Laboratory strain, 8325-4 with a repaired <i>rsbU</i> gene; SigB positive                            | 14         |
| SH1000 <i>masA</i> ::Tn              | <i>masA</i> transposon mutant in SH1000                                                              | This study |
| SH1000 <i>masA</i> ::Tn <i>pmasA</i> | <i>masA</i> transposon mutant complemented with <i>masA</i> gene housed in pRMC2 expression plasmid  | This study |
| JE2 <i>sigB</i> ::Tn                 | Sigma B transposon ( <i>sigB</i> ) mutant in JE2                                                     | 16         |

496

#### 497 **Genetic manipulations involving *masA***



498 The *masA* gene was amplified by PCR from JE2 using Phusion high-fidelity DNA polymerase  
499 (NEB) and primers MasFW: CGGGTACCGAACCCCTTTGAAACG (KpnI; T<sub>m</sub> 64.2 °C) and  
500 MasRV: GCGAGCTCGTTGCAATTATGTTATTGC (SacI; T<sub>m</sub> 63.4 °C) and cloned into the  
501 tetracycline inducible plasmid pRMC2 to make *pmasA*. This was electroporated into *S. aureus*  
502 RN4220 and subsequently into JE2 to complement the *masA* transposon mutant. DNA from  
503 JE2*masA*::Tn was transduced into wild-type SH1000 by transduction with  $\phi$ 11 as described  
504 previously (23) and transductants containing the inserted transposon were screened on TSA  
505 containing erythromycin (10  $\mu$ g/mL). SH1000*masA*::Tn was verified for Tn insertion of *masA*  
506 by colony PCR using the above *masA* primers.

507

#### 508 **Monocyte (THP-1) toxicity**

509 The monocytic THP-1 cell line (ATCC TIB-202) was used as previously described (8). Briefly,  
510 cells were grown in 30 mL of RPMI-1640, supplemented with heat-inactivated fetal bovine  
511 serum (10 %), L-glutamine (1  $\mu$ M), penicillin (200 units/mL) and streptomycin (0.1 mg/mL)  
512 (defined as complete medium) in a humidified incubator at 37°C with 5% CO<sub>2</sub>. For toxicity  
513 assays, cells were harvested by centrifugation at 400 x *g* and resuspended to a final density  
514 of 1-1.5 x 10<sup>6</sup> cells/mL in tissue-grade phosphate buffered saline (PBS), typically yielding >  
515 95% viability assessed by trypan blue exclusion and easyCyte flow cytometry.

516

517

#### 518 **Bronchial epithelial cell (A549) toxicity**

519 A549 cells were grown in complete media. When confluent (80-90%), cells were detached  
520 with trypsin EDTA (0.25% ThermoFisher), resuspended, centrifuged for 10 min at 400 x *g* and  
521 resuspended to 1-1.5 x 10<sup>6</sup> cells/mL in tissue grade PBS. To determine *S. aureus* toxicity 75  
522  $\mu$ L of bacterial supernatant (Neat, 75%, 50% and 25%) were incubated with 75  $\mu$ L of A549  
523 cells in 96 well plate for 20 min at 37 °C. Cell lysis was measured as lactate dehydrogenase  
524 release using the CytoTox 96 Non-Radioactive Cytotoxicity Assay (Promega) according to  
525 manufacturer's instructions. Experiments were done in triplicate three times and results  
526 represent the mean  $\pm$  SD.

527

#### 528 **Human red blood corpuscle Toxicity**

529 Human red blood corpuscles (RBCs) were isolated from heparinized venous blood obtained  
530 from healthy adult volunteers. RBCs were washed twice in sterile saline (0.9% NaCl) and  
531 centrifuged at 600 x *g* for 10 min. RBCs were diluted to 1% in PBS and 200  $\mu$ L was incubated  
532 with 50  $\mu$ L of bacterial supernatant in a 96 well plate for 30 min at 37 °C. Plates were  
533 centrifuged for 5 min at 400 x *g* supernatants transferred to a sterile 96 well plate and RBC

534 lysis evaluated by determining the absorbance at 404<sub>nm</sub>. Saline and 0.5% Triton X-100 were  
535 used as negative and positive controls respectively.

536

### 537 **Toxin expression quantification**

538 For alpha toxin overnight cultures of *S. aureus* were diluted 1:1,000 in 5 mL TSB and incubated  
539 for 18 h at 37°C with shaking (180 rpm). Bacteria were normalized to an OD<sub>600</sub> of 2, centrifuged  
540 for 10 min at 10,000 x g, supernatant removed and proteins precipitated using trichloroacetic  
541 acid (TCA) at a final concentration of 20% for 2 h on ice. Samples were centrifuged at 18,000  
542 x g for 20 min at 4°C, washed three times in ice-cold acetone and solubilized in 100 µl 8 M  
543 urea. Proteins (10 µl of each sample) were mixed with 2x-concentrated sample buffer and  
544 heated at 95°C for 5 min before being subjected to 12% SDS-PAGE. Separated proteins were  
545 wet transferred onto a nitrocellulose membrane and afterwards blocked overnight in 5% semi-  
546 skimmed milk at 4°C. Membranes were washed and incubated with polyclonal antibodies  
547 specific for alpha-toxin (1:5,000 dilution; Sigma-Aldrich) for 2 h at room temperature.  
548 Membranes were washed and incubated with horseradish peroxidase-coupled protein G  
549 (1:1,000; Invitrogen) for 1 h at room temperature. Proteins were detected by using the Opti-  
550 4CN detection kit (Bio-Rad). The Western blots were performed in triplicate, and the bands  
551 were scanned and quantified by using ImageJ software (<http://rsbweb.nih.gov/ij/>). For Phenol  
552 soluble modulin (PSM) quantification, including delta toxin were measured using reverse-  
553 phase high performance liquid chromatography/mass spectrometry (RP-HPLC/MS) as  
554 described previously (24).

555

### 556 **qRT-PCR**

557 Cultures of *S. aureus* grown overnight in TSB were diluted 1:1,000 in fresh TSB and grown at  
558 37°C for 7 h. Cultures were normalised based on OD<sub>600</sub> measurements prior to RNA isolation.  
559 Cultures were treated with two volumes of RNAprotect (Qiagen) incubated for 10 min at room  
560 temperature, centrifuged and the pellet was resuspended in Tris-EDTA (TE) buffer (Ambion)  
561 with lysostaphin (5 mg/mL) and incubated for 1 h, followed by proteinase K treatment for 30  
562 min. RNA was isolated using the Quick-RNA kit (ZYMO RESEARCH). RNA was quantified  
563 using a NanoDrop (Thermo Fisher Scientific). Reverse transcription was performed using the  
564 qScript cDNA Synthesis Kit (QuantaBio) according to manufacturer's instructions using random  
565 primers. Standard curves were generated for both *sigA* [29] (Forward: 5'-  
566 AACTGAATCCAAGTCATCTTAGTC- 3' and reverse: 5'-TCATCACCTTGTTCAATACGTTTG-  
567 3') and *malIII* (Forward: 5'-GAAGGAGTGATTTCAATGGCACAAG- 3' and reverse: 5'-  
568 TCATCACCTTGTTCAATACGTTTG- 3') primers using genomic DNA to determine efficiency.  
569 Real-time PCR was performed using the SYBR Green QPCR Mix (NeoBiotech) and the Mic  
570 qPCR Cycler (bio molecular systems). Cycling conditions were 95°C for 10 min followed by

571 40 cycles of 95°C for 15 s and 60°C for 1 min and a dissociation step 95°C for 15 s and 60°C  
572 for 1 min. Cycle threshold values were determined for at least 3 biological repeats. For each  
573 reaction, the ratio of RNA III and *gyrB* transcript number was calculated as follows:  $2^{(Ct\ gyrB$   
574  $- Ct\ RNAIII)$ .

575

#### 576 **Carotenoid pigment analysis**

577 Carotenoid pigment analysis was performed as described previously [19] with minor  
578 modifications. Overnight bacterial cultures were used to inoculate 5 mL of fresh TSB in a  
579 1:1,000 dilution which was subsequently grown for 24h at 37°C with shaking (180 rpm). 1 ml  
580 of bacterial culture was centrifuged for 10,000 x *g* for 5 min, supernatant discarded, and cells  
581 resuspended in 500 µl 100% methanol. Cells were heated for 3 min at 55°C in a water bath,  
582 vortexed and centrifuged at 10,000 x *g* for 2 min to remove cell debris and extraction repeated  
583 twice. The absorbance of the methanol extracts was measured at 465<sub>nm</sub> using a photometer  
584 (SPECTROstar Nano, BMG Labtech). JE2*sigB*::Tn was used as a negative control.

585

#### 586 **SDS-Stability**

587 The *S. aureus* strains were grown overnight in TSB, used at a 1:1000 dilution to inoculate TSB  
588 containing a range of concentrations of sodium dodecyl sulphate (sigma). The ability of the  
589 withstand the membrane damaging effect of the detergents was determined by quantifying  
590 bacterial growth (OD<sub>600</sub>) after 24 hours.

591

#### 592 **Membrane-Stability**

593 The *S. aureus* strains were grown overnight in TSB, or TSB containing varying concentrations  
594 of hemin. Cells were harvested by centrifugation, resuspended in PBS to a concentration of 1  
595 x 10<sup>6</sup> cells per ml. 100 µl of bacterial cells were incubated with PI for 5 minutes at room  
596 temperature prior to flow cytometric analysis on a Novocyte (ACEA Biosciences). Data were  
597 analysed using FlowJo 10.5

598

#### 599 **Oleic acid susceptibility**

600 Bacteria were grown overnight, subcultured 1:1,000 in fresh TSB and grown for 18h. Bacteria  
601 were washed twice in 2M NaCl-2mM EDTA buffer, normalised to an OD<sub>600</sub> of 1, and further  
602 diluted 1:1,000 in above buffer. Oleic acid (Sigma) was initially dissolved in ethanol and  
603 working solution were further prepared in 2M NaCl-2mM EDTA buffer. 100 µl of cells were  
604 incubated with either 100 µl of buffer or oleic acid solution (6 µg/mL final concentration) in  
605 duplicate for 1 h at 37°C. Bacteria were enumerated following dilution in PBS and plating onto  
606 TSA. Bacterial survival was calculated by dividing the number of bacteria from wells containing  
607 oleic acid by bacteria from wells containing control.

608

### 609 **Antimicrobial peptide susceptibility**

610 Human neutrophil defensin-1 (hNP-1) (AnaSpec Incorporated, California, USA) susceptibility  
611 assay was performed as described previously (15). Briefly, a final inoculum of  $10^5$  CFU was  
612 resuspended in 1 % BHI supplemented with 10 mM potassium phosphate buffer and a final  
613 concentration of 5  $\mu$ g/mL of hNP-1 and incubated for 2 h at 37 °C. Final bacterial concentration  
614 was evaluated by serial plating onto TSA plates and data represented as mean ( $\pm$  SD) percent  
615 survival CFU.

616

### 617 **Phagocytosis assay**

618 THP-1 cells (tested were harvested by centrifugation and resuspended in fresh complete  
619 medium to  $2 \times 10^5$  cells/mL. Monocytes were differentiated by the addition of phorbol 12-  
620 myristate 13-acetate (PMA) at a final concentration of 100 nM and 500  $\mu$ L of cells were added  
621 to a tissue culture treated 24 well plate (Nunc) for 48 h. THP-1 cells were washed twice in  
622 tissue grade PBS and incubated with complete medium 24 h before infection. Two hours  
623 before infection, THP-1 cells were washed twice in PBS and cells incubated in complete media  
624 without antibiotics. Bacterial strains were grown overnight, diluted 1:100 in fresh TSB and  
625 grown to an OD of 0.3. Bacterial cells were washed twice in PBS and an MOI of 1 was  
626 established to infect THP-1 cells. Plates were centrifuged at 300 x g for 5 min to synchronise  
627 phagocytosis and incubated at 37°C with 5% CO<sub>2</sub> for 1 h. Following 1 h incubation, media was  
628 discarded, cells washed four times in PBS and wells incubated with RPMI media containing  
629 gentamicin (200  $\mu$ g/mL) and lystostaphin (20  $\mu$ g/mL) for 1 h. Media was discarded and wells  
630 for 2 h time points were lysed with triton X-100 (0.01%) and CFU enumerated on Tryptic soy  
631 agar (TSA) plates and wells for 6 h analysis were further incubated in RPMI containing no  
632 antibiotics and processed as above.

633

### 634 **Streptonigrin Susceptibility Assay**

635 Normalised OD<sub>600</sub> overnight cultures were diluted 1:100 in PBS and 100  $\mu$ l were mixed with 3  
636 ml 0.5% agar and poured over TSA plates. When dry, 1.5  $\mu$ l of streptonigrin (2.5 mg/ml;  
637 dissolved in DMSO) was spotted onto the plate. Plates were incubated at 37°C for 18 hours  
638 and zones of clearance were measured. Data are represented as area of the growth inhibition  
639 zone.

640

### 641 **Mice**

642 Age (6-8 weeks) and sex matched wild-type BALB/c mice were purchased from Charles River  
643 Laboratories UK. Mice were housed under specific pathogen-free conditions at the Trinity  
644 College Dublin Comparative Medicines unit. All animal experiments were conducted in

645 accordance with the recommendations and guidelines of the health product regulatory  
646 authority (HPRA), the competent authority in Ireland and in accordance with protocols  
647 approved by Trinity College Dublin Animal Research Ethics Committee.

648

#### 649 **Murine subcutaneous abscess model**

650 The dorsal backs of mice were shaved and injected subcutaneously with *S. aureus* ( $2 \times 10^7$   
651 CFU) in 100  $\mu$ l of sterile PBS using a 27-gauge syringe (BD Biosciences). Measurements of  
652 abscess lesion area ( $\text{cm}^2$ ) were made by analysing digital photographs using M3 Vision  
653 software (Biospace Lab) and pictures contain a millimetre ruler as a reference. To determine  
654 the bacterial burden, 8mm punch biopsies of lesional skin were taken at day 3 and 6 post-  
655 infection. Tissue was homogenized in sterile PBS and total bacterial burden was determined  
656 by plating out serial dilutions on TSA.

657

#### 658 **Murine bloodstream infection model**

659  $5 \times 10^7$  cells of JE2, JE2masA::tn or JE2agrB::tn via tail vein injection. Mice culled at 6 and 24  
660 hours. Blood was collected by cardiac puncture. Liver, spleen and kidney were harvested and  
661 homogenised in 1ml of PBS. Bacterial burdens were established by plating out serial dilutions  
662 of blood and organ homogenates on TSA.

663

#### 664 **Protein extraction, TMT labelling and high pH reversed-phase chromatography**

665 Aliquots of 100  $\mu$ g of up to ten samples per experiment were digested with trypsin (2.5  $\mu$ g  
666 trypsin per 100  $\mu$ g protein; 37 °C, overnight), labelled with Tandem Mass Tag (TMT) ten plex  
667 reagents according to the manufacturer's protocol (Thermo Fisher Scientific) and the labelled  
668 samples pooled. An aliquot of the pooled sample was evaporated to dryness and resuspended  
669 in buffer A (20 mM ammonium hydroxide, pH 10) prior to fractionation by high pH reversed-  
670 phase chromatography using an Ultimate 3000 liquid chromatography system (Thermo Fisher  
671 Scientific). In brief, the sample was loaded onto an XBridge BEH C18 column (130 Å, 3.5  $\mu$ m,  
672 2.1 mm  $\times$  150 mm, Waters, UK) in buffer A and peptides eluted with an increasing gradient of  
673 buffer B (20 mM ammonium hydroxide in acetonitrile, pH 10) from 0 to 95% over 60 min. The  
674 resulting fractions were evaporated to dryness and resuspended in 1% formic acid prior to  
675 analysis by nano-LC MSMS using an Orbitrap Fusion Tribrid mass spectrometer (Thermo  
676 Scientific).

677

#### 678 **Nano-LC mass spectrometry**

679 High pH RP fractions were further fractionated using an Ultimate 3000 nanoHPLC system in  
680 line with an Orbitrap Fusion Tribrid mass spectrometer (Thermo Scientific). In brief, peptides  
681 in 1% (vol/vol) formic acid were injected onto an Acclaim PepMap C18 nano-trap column

682 (Thermo Scientific). After washing with 0.5% (vol/vol) acetonitrile 0.1% (vol/vol), formic acid  
683 peptides were resolved on a 250 mm × 75 µm Acclaim PepMap C18 reverse phase analytical  
684 column (Thermo Scientific) over a 150 min organic gradient, using seven gradient segments  
685 (1–6% solvent B over 1 min, 6–15% B over 58 min, 15–32% B over 58 min, 32–40% B over  
686 5 min, 40–90% B over 1 min, held at 90% B for 6 min and then reduced to 1% B over 1 min)  
687 with a flow rate of 300 nl min<sup>-1</sup>. Solvent A was 0.1% formic acid and solvent B was aqueous  
688 80% acetonitrile in 0.1% formic acid. Peptides were ionised by nano-electrospray ionisation  
689 at 2.0 kV using a stainless steel emitter with an internal diameter of 30 µm (Thermo Scientific)  
690 and a capillary temperature of 275 °C.

691  
692 All spectra were acquired using an Orbitrap Fusion Tribrid mass spectrometer controlled by  
693 Xcalibur 2.0 software (Thermo Scientific) and operated in data-dependent acquisition mode  
694 using an SPS-MS3 workflow. FTMS1 spectra were collected at a resolution of 120,000 with  
695 an automatic gain control (AGC) target of 200,000 and a max injection time of 50 ms.  
696 Precursors were filtered with an intensity threshold of 5000 according to charge state (to  
697 include charge states 2–7) and with monoisotopic precursor selection. Previously interrogated  
698 precursors were excluded using a dynamic window (60s ± 10 ppm). The MS2 precursors were  
699 isolated with a quadrupole mass filter set to a width of 1.2 m/z. ITMS2 spectra were collected  
700 with an AGC target of 10,000, max injection time of 70 ms and CID collision energy of 35%.  
701 For FTMS3 analysis, the Orbitrap was operated at 50,000 resolution with an AGC target of  
702 50,000 and a max injection time of 105 ms. Precursors were fragmented by high energy  
703 collision dissociation (HCD) at a normalised collision energy of 60% to ensure maximal TMT  
704 reporter ion yield. Synchronous precursor selection (SPS) was enabled to include up to five  
705 MS2 fragment ions in the FTMS3 scan.

706

### 707 **Proteomic data analysis**

708 The raw data files were processed and quantified using Proteome Discoverer software v2.1  
709 (Thermo Scientific) and searched against the UniProt *Staphylococcus aureus* strain NCTC  
710 8325 database using the SEQUEST algorithm [39]. Peptide precursor mass tolerance was set  
711 at 10 ppm and MS/MS tolerance was set at 0.6 Da. Search criteria included oxidation of  
712 methionine (+ 15.9949) as a variable modification and carbamidomethylation of cysteine  
713 (+ 57.0214) and the addition of the TMT mass tag (+ 229.163) to peptide N-termini and lysine  
714 as fixed modifications. Searches were performed with full tryptic digestion and a maximum of  
715 two missed cleavages were allowed. The reverse database search option was enabled and  
716 all peptide data were filtered to satisfy a false discovery rate of 5%.

717

### 718 **Statistics**

719 Paired two-tailed student t-test (GraphPad Prism v5.0) were used to analyse the observed  
720 differences between experimental results. A  $p$ -value  $<0.05$  was considered statistically  
721 significant. For in vivo studies two-way ANOVA with Tukey post- was used to analyze  
722 differences between groups.

723  
724  
725

## 726 References

- 727 1. Lowy, F.D. Staphylococcus aureus infections. *N Engl J Med.* 339, 520-32 (1998).
- 728 2. Gordon, R.J. & F.D. Lowy, Pathogenesis of methicillin-resistant Staphylococcus aureus  
729 infection. *Clin Infect Dis.* **46**, S350-9 (2008).
- 730 3. [https://assets.publishing.service.gov.uk/government/uploads/system/uploads/attachment\\_](https://assets.publishing.service.gov.uk/government/uploads/system/uploads/attachment_data/file/724361/S_aureus_summary_2018.pdf)  
731 [data/file/724361/S\\_aureus\\_summary\\_2018.pdf](https://assets.publishing.service.gov.uk/government/uploads/system/uploads/attachment_data/file/724361/S_aureus_summary_2018.pdf)
- 732 4. Jokinen E. et al. Trends in incidence and resistance patterns of Staphylococcus aureus  
733 bacteremia. *Infect Dis (Lond).* **50**, 52-58 (2018).
- 734 5. Tong S.Y et al. Staphylococcus aureus infections: epidemiology, pathophysiology, clinical  
735 manifestations, and management. *Clin Microbiol Rev.* **28**, 603-61 (2015).
- 736 6. Seilie, E.S. & Bubeck Wardenburg J. Staphylococcus aureus pore-forming toxins: The  
737 interface of pathogen and host complexity. *Semin Cell Dev Biol.* **72**,101-116. (2017).
- 738 7. Tam K & Torres VJ. Staphylococcus aureus Secreted Toxins and Extracellular Enzymes.  
739 *Microbiol Spectr.* **7**. (2019).
- 740 8. Cheung GY, Joo HS, Chatterjee SS & Otto M. Phenol-soluble modulins--critical  
741 determinants of staphylococcal virulence. *FEMS Microbiol Rev.* **38**, 698-719 (2014).
- 742 9. Wang R et al. Identification of novel cytolytic peptides as key virulence determinants for  
743 community-associated MRSA. *Nat Med.* **13**, 1510-4 (2007).
- 744 10. Le KY & Otto M. Quorum-sensing regulation in staphylococci-an overview. *Front Microbiol.*  
745 **6**,1174 (2015).
- 746 11. Bischoff M. et al. Microarray-based analysis of the Staphylococcus aureus sigmaB  
747 regulon. *J Bacteriol.* **186**, 4085-99 (2004).
- 748 12. Recker M et al., Clonal differences in Staphylococcus aureus bacteraemia-associated  
749 mortality. *Nat Microbiol*, **2**, 1381-1388 (2017).
- 750 13. Laabei M et al., Predicting the virulence of MRSA from its genome sequence. *Genome*  
751 *Res*, **24**, 839-49 (2014).
- 752 14. Laabei M et al., Evolutionary Trade-Offs Underlie the Multi-faceted Virulence of  
753 Staphylococcus aureus. *PLoS Biol*, **13**, e1002229 (2015).
- 754 15. Diep et al. Complete genome sequence of USA300, an epidemic clone of community-  
755 acquired meticillin-resistant Staphylococcus aureus. *Lancet.* **367**, 731-9 (2006).
- 756 16. Fey, P.D., et al., A genetic resource for rapid and comprehensive phenotype screening of  
757 nonessential Staphylococcus aureus genes. *MBio*, **4**, e00537-12 (2013).
- 758 17. Corrigan RM & T. Foster. An improved tetracycline-inducible expression vector for  
759 *Staphylococcus aureus*. *Plasmid.* **61**, 126-9 (2009).
- 760 18. Horsburgh MJ et al., sigmaB modulates virulence determinant expression and stress  
761 resistance: characterization of a functional rsbU strain derived from Staphylococcus aureus  
762 8325-4. *J Bacteriol.* **184**, 5457-67 (2002).
- 763 19. Omasits, U et al., Protter: interactive protein feature visualization and integration with  
764 experimental proteomic data. *Bioinformatics.* **30**, 884-6 (2014).
- 765 20. Liu et al. Staphylococcus aureus golden pigment impairs neutrophil killing and promotes  
766 virulence through its antioxidant activity. *J Exp Med.* **202**, 209-15 (2005).
- 767 21. Mishra NN et al., Carotenoid-related alteration of cell membrane fluidity impacts  
768 Staphylococcus aureus susceptibility to host defense peptides. *Antimicrob Agents*  
769 *Chemother.* **55**, 526-31 (2011).

- 770 22. Dayon L & Sanchez JC. Relative protein quantification by MS/MS using the tandem mass  
771 tag technology. *Methods Mol Biol.* **893**, 115–127 (2012).
- 772 23. Muryoi N et al. Demonstration of the iron-regulated surface determinant (Isd) heme  
773 transfer pathway in *Staphylococcus aureus*. *J Biol Chem.* **283**, 28125-36 (2008).
- 774 24. Torrex VJ et al. A *Staphylococcus aureus* regulatory system that responds to host heme  
775 and modulates virulence. *Cell Host Microbe.* **1**, 109-19 (2007).
- 776 25. Yeowell HN & White JR. Iron requirement in the bactericidal mechanism of streptonigrin.  
777 *Antimicrob Agents Chemother.* **22**, 961-8 (1982).
- 778 26. Bullen JJ & Griffiths E. Iron and Infection: Molecular, Physiological and Clinical Aspects.  
779 John Wiley and Sons; New York: 1999.
- 780 27. Kafala B & Sasarman A. Isolation of the *Staphylococcus aureus* hemCDBL gene cluster  
781 coding for early steps in heme biosynthesis. *Gene.* **199**, 231-9 (1997).
- 782 28. Yokoyama et al. Epistasis analysis uncovers hidden antibiotic resistance-associated  
783 fitness costs hampering the evolution of MRSA. *Genome Biol.* **19**, 94 (2018).
- 784 29. Attia AS, Benson MA, Stauff DL, Torres VJ & Skaar EP. Membrane damage elicits an  
785 immunomodulatory program in *Staphylococcus aureus*. *PLoS Pathog.* **6**, e1000802  
786 (2010).
- 787 30. Lojek LJ, Farrand AJ, Weiss A & Skaar EP. Fur regulation of *Staphylococcus aureus* heme  
788 oxygenases is required for heme homeostasis. *Int J Med Microbiol.* 2018 Aug;308(6):582-  
789 589.
- 790 31. Pozzi C et al. Vaccines for *Staphylococcus aureus* and Target Populations. *Curr Top*  
791 *Microbiol Immunol.* **409**, 491-528 (2017).
- 792 32. Boyle-Vavra S et al. USA300 and USA500 clonal lineages of *Staphylococcus aureus* do  
793 not produce a capsular polysaccharide due to conserved mutations in the cap5 locus. *MBio.*  
794 **6**(2) (2015).
- 795
- 796 22. Allen, R.C., et al., Targeting virulence: can we make evolution-proof drugs? *Nat Rev*  
797 *Microbiol*, 2014. 12(4): p. 300-8.
- 798 23. Gray, B., P. Hall, and H. Gresham, Targeting agr- and agr-Like quorum sensing  
799 systems for development of common therapeutics to treat multiple gram-positive bacterial  
800 infections. *Sensors (Basel)*, 2013. 13(4): p. 5130-66.
- 801 24. Fowler, V.G., Jr., et al., Persistent bacteremia due to methicillin-resistant  
802 *Staphylococcus aureus* infection is associated with agr dysfunction and low-level in vitro  
803 resistance to thrombin-induced platelet microbicidal protein. *J Infect Dis*, 2004. 190(6): p.  
804 1140-9.
- 805 25. Rose, H.R., et al., Cytotoxic Virulence Predicts Mortality in Nosocomial Pneumonia  
806 Due to Methicillin-Resistant *Staphylococcus aureus*. *J Infect Dis*, 2015. 211(12): p. 1862-74.
- 807 26. Neumann, Y., et al., The effect of skin fatty acids on *Staphylococcus aureus*. *Arch*  
808 *Microbiol*, 2015. 197(2): p. 245-67.
- 809 29. Moormeier, D.E., et al., Use of microfluidic technology to analyze gene expression  
810 during *Staphylococcus aureus* biofilm formation reveals distinct physiological niches. *Appl*  
811 *Environ Microbiol*, 2013. 79(11): p. 3413-24.
- 812
- 813
- 814
- 815
- 816 27. Tiwari, K.B., C. Gatto, and B.J. Wilkinson, Interrelationships between Fatty Acid  
817 Composition, Staphyloxanthin Content, Fluidity, and Carbon Flow in the *Staphylococcus*  
818 *aureus* Membrane. *Molecules*, 2018. 23(5).
- 819 28. Perez-Lopez, M.I., et al., Variations in carotenoid content and acyl chain composition  
820 in exponential, stationary and biofilm states of *Staphylococcus aureus*, and their influence on  
821 membrane biophysical properties. *Biochim Biophys Acta Biomembr*, 2019. 1861(5): p. 978-  
822 987.



823  
824  
825  
826  
827  
828  
829  
830  
831  
832  
833  
834  
835

**Supplementary Material**

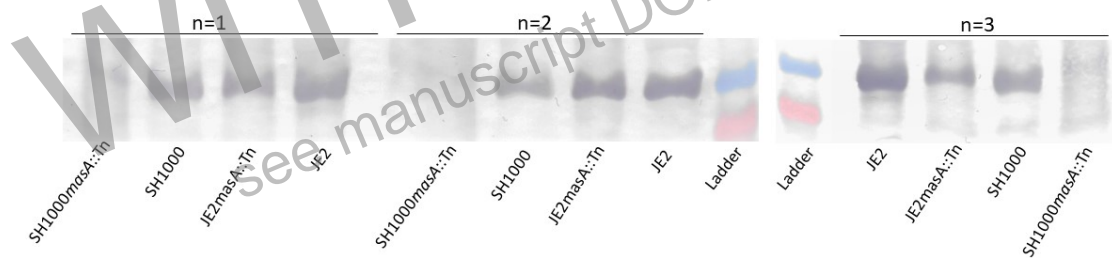

836  
837  
838  
839  
840  
841

**Supplementary Figure 1:** The effect of *masA* deletion on alpha toxin secretion was determined by western blotting using anti-alpha toxin antibodies. These blots were scanned, the relative quantity of alpha toxin quantified using ImageJ and these data presented in Figure 1E). Blots from three independent experiments are shown.

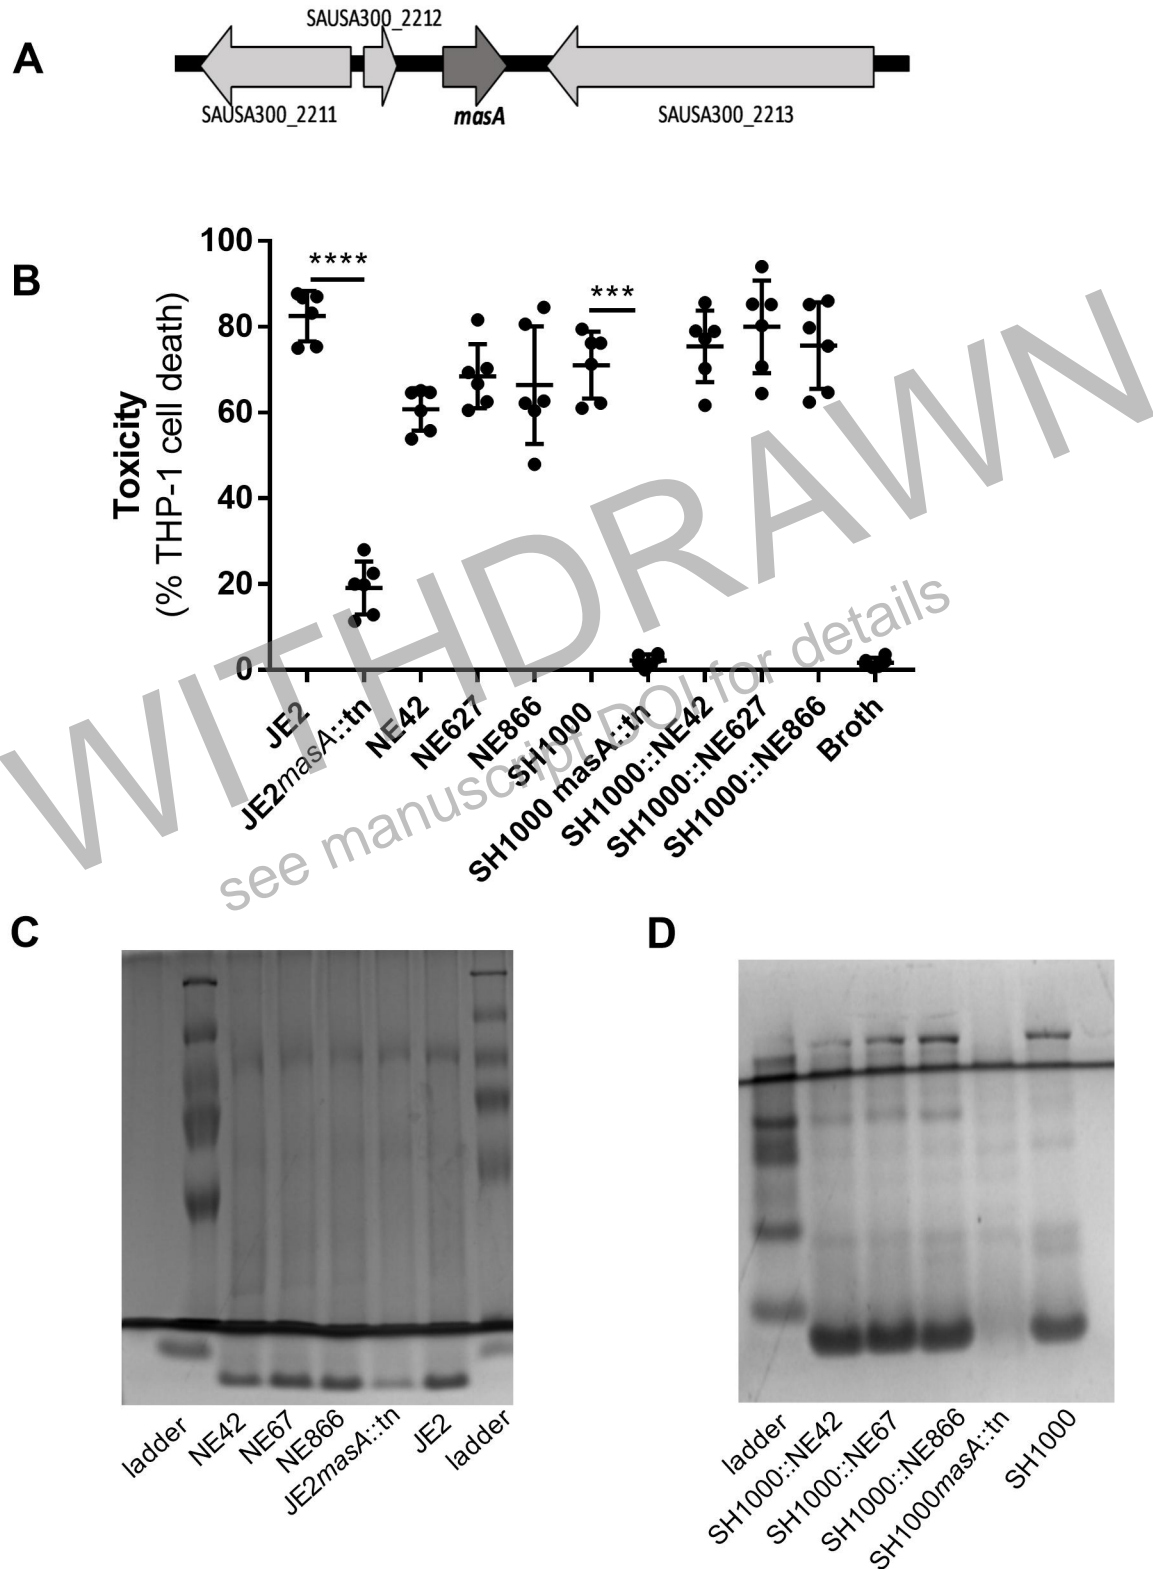

848 Representative gels are shown of TCA extractions of PSMs from transposon mutants in the  
 849 *masA* locus the JE2 (C) and SH1000 (D) backgrounds.  
 850

851

852

853

854 **Supplementary Table 1:**

| Accession | Functional Description                              | Fold change | p-Value  |
|-----------|-----------------------------------------------------|-------------|----------|
| Q2FVR0    | Hemin transport system permease protein HrtB        | 18.0 ↑      | < 0.0001 |
| Q2G079    | Protein NrdI                                        | 5.8 ↑       | 0.002    |
| Q2G2P2    | Globin domain protein                               | 3.6 ↑       | 0.001    |
| Q2FUQ9    | Cold shock protein                                  | 3.5 ↑       | 0.027    |
| Q2FX98    | Uncharacterized protein                             | 3.2 ↑       | 0.003    |
| Q2FZX4    | Lipoyl synthase                                     | 2.7 ↑       | < 0.0001 |
| Q2FVR1    | Hemin import ATP-binding protein HrtA               | 2.7 ↑       | 0.006    |
| Q2G0T9    | Alpha amylase family protein                        | 2.7 ↑       | 0.003    |
| Q2FXF4    | Uncharacterized protein                             | 2.7 ↑       | 0.037    |
| Q2FZA9    | Carbamate kinase 1                                  | 2.6 ↑       | < 0.0001 |
| Q8KQR1    | Iron-regulated surface determinant protein C        | 2.6 ↑       | 0.002    |
| P72360    | Iron-sulfur cluster repair protein ScdA             | 2.6 ↑       | 0.006    |
| Q2G1N4    | Periplasmic binding protein                         | 2.5 ↑       | 0.008    |
| Q2G1X0    | Alpha-hemolysin                                     | 2.4 ↑       | 0.008    |
| Q2FWY2    | Pyrazinamidase/nicotinamidase                       | 2.4 ↑       | 0.029    |
| Q2FV74    | ATP-dependent Clp protease ATP-binding subunit ClpL | 2.4 ↑       | 0.001    |
| Q2G2R5    | PTS system lactose-specific IIA component           | 2.3 ↑       | 0.003    |
| Q2FW75    | ABC transporter periplasmic binding protein         | 2.3 ↑       | 0.002    |
| Q2FVE7    | Peptide ABC transporter, peptide-binding protein    | 2.3 ↑       | 0.004    |
| Q2FWB7    | Uncharacterized protein                             | 2.2 ↑       | 0.021    |
| Q2FYK3    | Conserved virulence factor C                        | 2.2 ↑       | 0.004    |
| Q2FXE1    | Uncharacterized protein                             | 2.2 ↑       | 0.007    |
| Q2FZB0    | Ornithine carbamoyltransferase                      | 2.2 ↑       | < 0.0001 |
| Q2FZI9    | Probable quinol oxidase subunit 2                   | 2.2 ↑       | 0.006    |
| Q2FVF9    | Uncharacterized protein                             | 2.1 ↑       | 0.034    |
| Q2FV17    | Fructose-bisphosphate aldolase class 1              | 2.1 ↑       | < 0.0001 |
| Q2FZF0    | Iron-regulated surface determinant protein B        | 2.1 ↑       | 0.080    |
| Q2G1Z3    | Iron compound ABC transporter                       | 2.1 ↑       | 0.002    |
| Q2FYN6    | Uncharacterized hydrolase                           | 2.0 ↓       | 0.155    |
| Q2G0L5    | Serine-aspartate repeat-containing protein C        | 2.0 ↓       | 0.001    |
| Q2G0W6    | Uncharacterized protein                             | 2.1 ↓       | 0.006    |
| Q2FUU5    | Lipase 1                                            | 2.1 ↓       | 0.002    |
| Q2FWZ8    | Bacterial non-heme ferritin                         | 2.1 ↓       | 0.001    |
| Q2G294    | Acetyl-CoA synthetase                               | 2.1 ↓       | 0.001    |
| Q2FZI6    | Bifunctional purine biosynthesis protein PurH       | 2.2 ↓       | < 0.0001 |
| Q2FVS2    | Uncharacterized protein                             | 2.2 ↓       | 0.001    |
| Q2G2P7    | Histidine ammonia-lyase                             | 2.2 ↓       | 0.006    |
| Q2FW51    | Truncated MHC class II analog protein               | 2.2 ↓       | 0.015    |
| Q2FVQ4    | L-lactate permease                                  | 2.2 ↓       | 0.006    |

|        |                                              |     |   |          |
|--------|----------------------------------------------|-----|---|----------|
| Q2FV59 | Dehydrosqualene synthase                     | 2.2 | ↓ | 0.001    |
| Q2FUX7 | Arginine deiminase                           | 2.3 | ↓ | 0.080    |
| Q2FVE0 | Alkyl hydroperoxide reductase AhpD           | 2.3 | ↓ | < 0.0001 |
| Q2G1C7 | Uncharacterized protein                      | 2.3 | ↓ | 0.006    |
| Q2FZR3 | Oligopeptide ABC transporter                 | 2.3 | ↓ | 0.004    |
| Q2FZS2 | Truncated MHC class II analog protein        | 2.4 | ↓ | 0.004    |
| Q2G0W8 | Uncharacterized protein                      | 2.4 | ↓ | 0.008    |
| Q2G2P5 | Uncharacterized protein                      | 2.4 | ↓ | 0.008    |
| Q2FV34 | Uncharacterized protein                      | 2.5 | ↓ | 0.001    |
| Q2G118 | Chromosome partitioning protein, ParB family | 2.5 | ↓ | 0.005    |
| Q2G1I8 | Uncharacterized protein                      | 2.5 | ↓ | 0.001    |
| Q2FZS8 | Chaperone protein ClpB                       | 2.5 | ↓ | 0.001    |
| Q2G087 | Histidinol-phosphate aminotransferase        | 2.6 | ↓ | 0.047    |
| Q2G1C9 | Uncharacterized protein                      | 2.6 | ↓ | < 0.0001 |
| Q2G0G1 | Alcohol dehydrogenase                        | 2.8 | ↓ | 0.017    |
| Q2FWN9 | Uncharacterized leukocidin-like protein 2    | 2.9 | ↓ | < 0.0001 |
| Q2G1C8 | Uncharacterized protein                      | 3.0 | ↓ | < 0.0001 |
| Q2G1D0 | Acetyl-CoA acetyltransferase                 | 4.4 | ↓ | 0.003    |
| Q2G1K9 | Aldehyde-alcohol dehydrogenase               | 4.6 | ↓ | 0.001    |
| Q2FWP0 | Uncharacterized leukocidin-like protein 1    | 4.9 | ↓ | 0.003    |
| Q2FVJ5 | ATP-dependent dethiobiotin synthetase BioD   | 6.3 | ↓ | 0.001    |
| Q2G218 | L-lactate dehydrogenase 1                    | 7.3 | ↓ | 0.001    |
| Q2G091 | ABC transporter                              | 9.4 | ↓ | < 0.0001 |
| Q2FVJ7 | Biotin synthase                              | 9.7 | ↓ | 0.001    |

855

856 # Accession corresponds to protein identifier in UniProt database.

857 € Fold change of proteins were determined by comparing changes between JE2 and JE2*masA*::tn  
 858 protein abundances in three independent experiments.

859 \**p*-Value was calculated using the Student's *t*-test

860

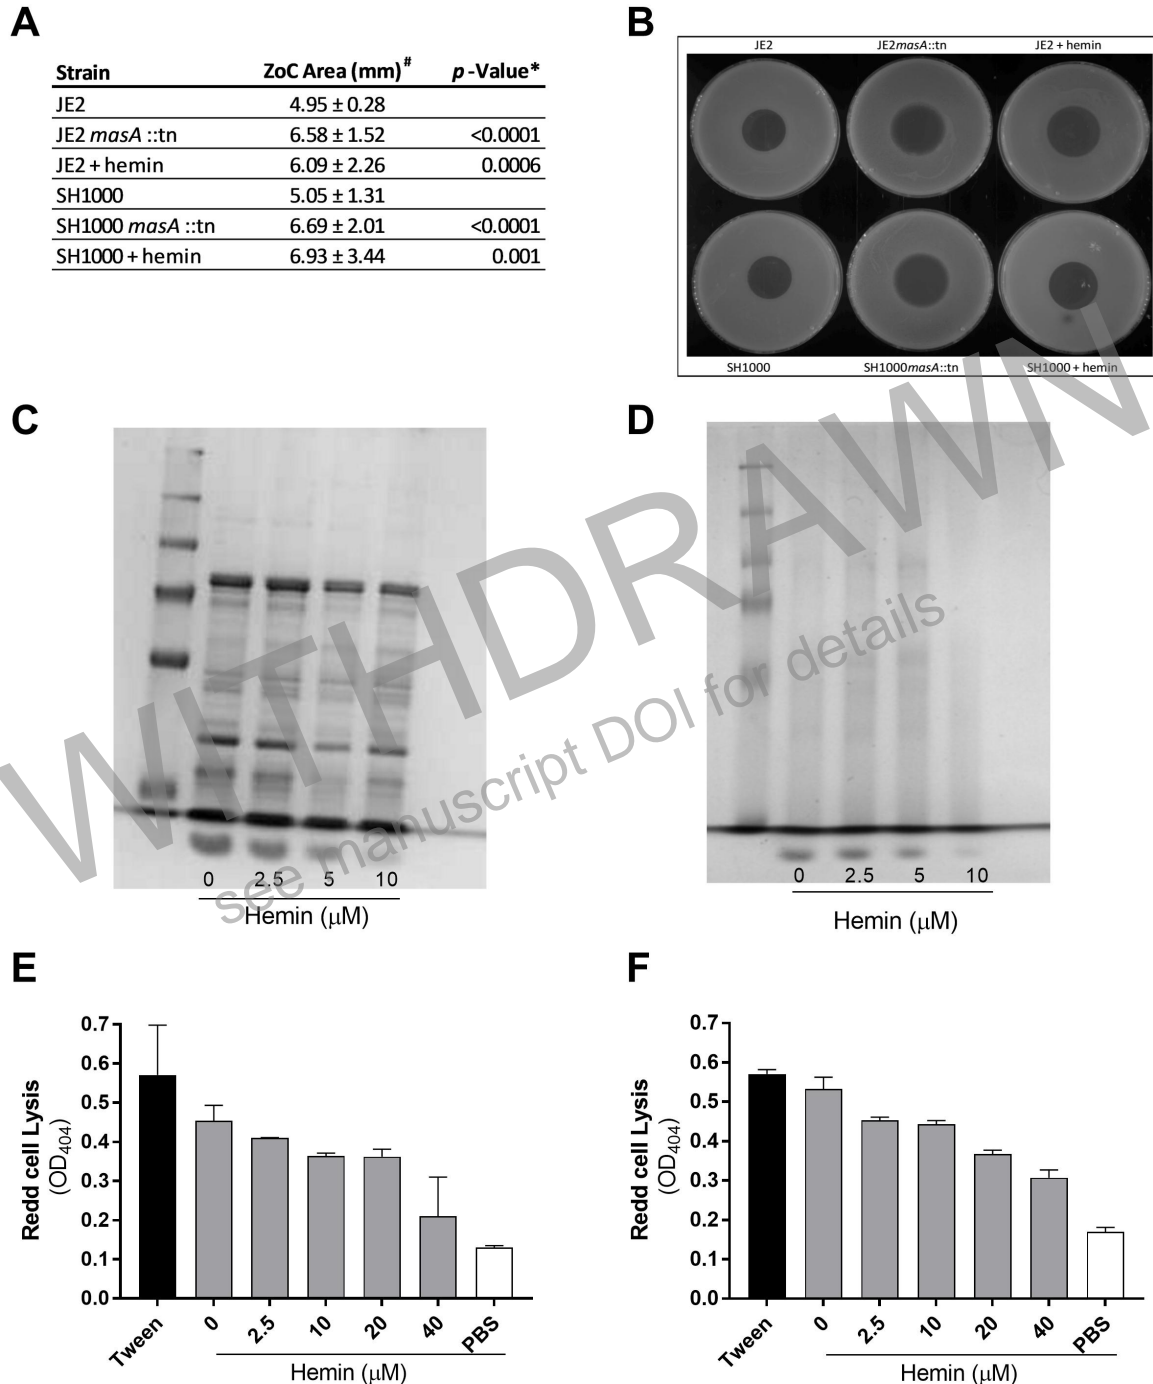

861

862 **Supplementary Figure 3:** (A) Ability of streptonigrin to inhibit growth of bacteria was  
 863 determined via measurement of zone of clearance (ZoC) around 2mg/ml streptonigrin. Greater  
 864 inhibition of growth occurs for *masA* mutants cultured in TSB and wild types cultured in hemin  
 865 compared to wild type cultured in TSB. (B) Images show representative pictures of the zones  
 866 of clearance with the following ZoC area in mm: JE2 6.15; JE2*masA*::Tn 9.07; JE2 + 50 μM  
 867 hemin 8.5; SH1000 5.7; SH1000*masA*::Tn 8.04; SH1000 + 50 μM hemin 7.06. JE2 (C) and  
 868 SH1000 (D) were cultured in various concentrations of hemin and toxins were subsequently  
 869 TCA precipitated from the supernatants and run on 10% agarose gels. PSM band intensity  
 870 decreases with increasing hemin concentration. Ability of JE2 (E) and SH1000 (F) to lyse  
 871 human red blood cells decreased with increasing hemin concentrations.

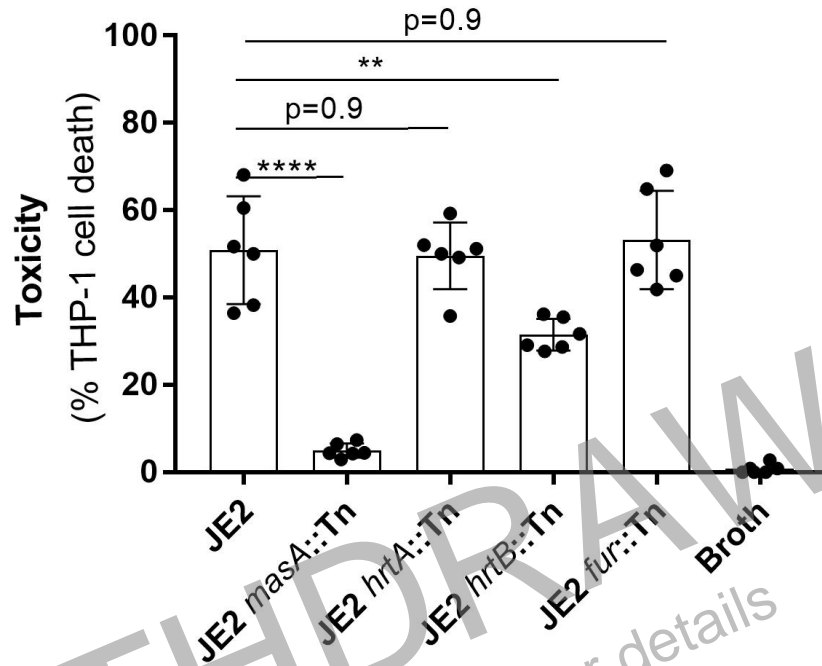

872  
873  
874  
875  
876  
877

**Supplementary Figure 4:** The toxicities of transposon mutants of *hrtA* and *hrtB* genes in the JE2 background were tested. JE2*hrtA*::Tn showed no difference in toxicity compared to JE2, while JE2*hrtB*::Tn showed a slightly reduced toxicity, however this was not as dramatic a loss of toxicity as observed in the JE2*masA*::tn strain.
